# Supplementary material for: Variation analysis of SARS-CoV-2 complete sequences from Iran
Source: Future Virol. 2022 Oct 22:10.2217/fvl-2021-0056. doi: 10.2217/fvl-2021-0056 (PMC9594980; doi:10.2217/fvl-2021-0056)
Supplement: Supplementary file 1 [file Supplementary_table_1.xlsx]

## Sheet: Supplementary_table_1
Name	GISAID Accession ID	Collection date	Location	Gender	Age	Status	Specimen type
hCoV-19/Iran/Qom-629/2020	EPI_ISL_1014676	2020-09-19	Asia / Iran / Qom	Male	unknown	Hospitalized	Throat swab
hCoV-19/Iran/Qom-907/2020	EPI_ISL_1014677	2020-03-07	Asia / Iran / Qom	Female	unknown	Hospitalized	Throat swab
hCoV-19/Iran/Ghilan-S1-32/2020	EPI_ISL_1014678	2020-08-22	Asia / Iran / Gilan	Male	unknown	Hospitalized	Throat swab
hCoV-19/Iran/Ghilan-S15-319/2020	EPI_ISL_1014679	2020-07-05	Asia / Iran / Gilan	Male	unknown	Outpatient	Throat swab
hCoV-19/Iran/Ghilan-T15-191/2020	EPI_ISL_1014680	2020-07-05	Asia / Iran / Gilan	Male	unknown	Outpatient	Throat swab
hCoV-19/Iran/Ghilan-M30-241/2020	EPI_ISL_1014681	2020-08-20	Asia / Iran / Gilan	Male	unknown	Outpatient	Throat swab
hCoV-19/Iran/Hamedan-66H/2020	EPI_ISL_1014682	2020-05-05	Asia / Iran / Hamedan	unknown	unknown	Hospitalized	Throat swab
hCoV-19/Iran/Urmia-715U/2020	EPI_ISL_1014683	2020-05-06	Asia / Iran / Urmia	Male	unknown	Hospitalized	Throat swab
hCoV-19/Iran/Urmia-931U/2020	EPI_ISL_1014684	2020-05-06	Asia / Iran / Urmia	Female	unknown	Hospitalized	Throat swab
hCoV-19/Iran/Kashmar-15K/2020	EPI_ISL_1014685	2020-12-27	Asia / Iran / Kashmar	Male	unknown	Outpatient	Throat swab
hCoV-19/Iran/Tehran-05V/2020	EPI_ISL_1014686	2020-12-09	Asia / Iran / Tehran	Male	unknown	Hospitalized	Throat swab
hCoV-19/Iran/Tehran-055M/2020	EPI_ISL_1014687	2020-08-17	Asia / Iran / Tehran	Female	unknown	Hospitalized	Throat swab
hCoV-19/Iran/AK-SARS-27/2020	EPI_ISL_1398364	2020-06-15	Asia / Iran / Alborz Province	Male	57	Live	Oropharyngeal swab
hCoV-19/Iran/AK-SARS-48/2020	EPI_ISL_1398925	2020-06-15	Asia / Iran / Alborz Province	Male	25	Live	Oropharyngeal swab
hCoV-19/Iran/AK-SARS-A7/2020	EPI_ISL_1398937	2020-05-13	Asia / Iran / Alborz Province	Male	43	Released
hCoV-19/Iran/Hormozgan/2020	EPI_ISL_1533610	2020-02-29	Asia / Iran / Hormozgan	unknown	unknown	Hospitalized
hCoV-19/Iran/Tehran-NIC-K23/2021	EPI_ISL_1993547	2021-04-12	Asia / Iran / Tehran	Male	45	Outpatient	Throat swab
hCoV-19/Iran/Hormozghan-NIC-15/2021	EPI_ISL_1993548	2021-04-04	Asia / Iran / Hormozgan	Male	82	Hospitalized	Throat swab
hCoV-19/Iran/Tehran-NIC-24/2021	EPI_ISL_1993549	2021-04-13	Asia / Iran / Tehran	Male	unknown	Outpatient	Throat swab
hCoV-19/Iran/Tehran-NIC-V30/2021	EPI_ISL_1993550	2021-04-19	Asia / Iran / Tehran	Male	36	Outpatient	Throat swab
hCoV-19/Iran/Tehran-NIC-SH17/2021	EPI_ISL_1993551	2021-04-06	Asia / Iran / Tehran	Male	42	Hospitalized	Throat swab
hCoV-19/Iran/Tehran-NIC-30/2021	EPI_ISL_1993552	2021-04-19	Asia / Iran / Tehran	Male	62	Outpatient	Throat swab
hCoV-19/Iran/Tehran-NIC-23K/2021	EPI_ISL_1993553	2021-04-12	Asia / Iran / Tehran	Female	40	Outpatient	Throat swab
hCoV-19/Iran/Tehran-NIC-28/2021	EPI_ISL_1993554	2021-04-17	Asia / Iran / Tehran	Male	unknown	Hospitalized	Throat swab
hCoV-19/Iran/Tehran-NIC-31/2021	EPI_ISL_1993555	2021-04-20	Asia / Iran / Tehran	Male	55	Outpatient	Throat swab
hCoV-19/Iran/Tehran-NIC-17/2021	EPI_ISL_1993556	2021-04-06	Asia / Iran / Tehran	Male	unknown	Outpatient	Throat swab
hCoV-19/Iran/Tehran-NIC-15/2021	EPI_ISL_1993557	2021-04-04	Asia / Iran / Tehran	Male	72	Outpatient	Throat swab
hCoV-19/Iran/GRC-S1221/2021	EPI_ISL_2227204	2021-04-29	Asia / Iran / Yazd	Male	44	unknown	Nasopharyngeal and oropharyngeal swab
hCoV-19/Iran/GRC-S1215/2021	EPI_ISL_2227268	2021-04-29	Asia / Iran / Yazd	Male	38	unknown	Nasopharyngeal and oropharyngeal swab
hCoV-19/Iran/GRC-S1218/2021	EPI_ISL_2227269	2021-04-29	Asia / Iran / Yazd	Male	46	unknown	Nasopharyngeal and oropharyngeal swab
hCoV-19/Iran/GRC-S1217/2021	EPI_ISL_2227270	2021-04-29	Asia / Iran / Yazd	Male	46	unknown	Nasopharyngeal and oropharyngeal swab
hCoV-19/Iran/GRC-S1216/2021	EPI_ISL_2227271	2021-04-28	Asia / Iran / Yazd	Male	30	unknown	Nasopharyngeal and oropharyngeal swab
hCoV-19/Iran/GRC-S1213/2021	EPI_ISL_2227272	2021-04-28	Asia / Iran / Yazd	Male	37	unknown	Nasopharyngeal and oropharyngeal swab
hCoV-19/Iran/GRC-S013/2021	EPI_ISL_2227273	2021-04-03	Asia / Iran / Hormozgan	Female	20	unknown	Nasopharyngeal and oropharyngeal swab
hCoV-19/Iran/GRC-Q0275/2021	EPI_ISL_2227280	2021-02-20	Asia / Iran / Arak	Female	35	unknown	Nasopharyngeal and oropharyngeal swab
hCoV-19/Iran/GRC-Q0283/2021	EPI_ISL_2227281	2021-02-20	Asia / Iran / Arak	Female	71	unknown	Nasopharyngeal and oropharyngeal swab
hCoV-19/Iran/GRC-P2623/2021	EPI_ISL_2227282	2021-02-14	Asia / Iran / Abadan	Female	31	unknown	Nasopharyngeal and oropharyngeal swab
hCoV-19/Iran/GRC-Zah-11-122/2021	EPI_ISL_2253220	2021-02-07	Asia / Iran / Zahedan	Female	41	unknown	Oropharyngeal swab
hCoV-19/Iran/GRC-Sh-11-109/2021	EPI_ISL_2254131	2021-01-26	Asia / Iran / Shiraz	Female	82	Hospitalized	Nasopharyngeal swab
hCoV-19/Iran/GRC-Zah-11-124/2021	EPI_ISL_2254498	2021-02-07	Asia / Iran / Zahedan	Male	23	unknown	Oropharyngeal swab
hCoV-19/Iran/GRC-Sh-11-110/2021	EPI_ISL_2254718	2021-01-26	Asia / Iran / Shiraz	Female	81	Hospitalized	Nasopharyngeal swab
hCoV-19/Iran/GRC-Sh-11-114/2021	EPI_ISL_2254719	2021-01-19	Asia / Iran / Shiraz	Male	73	Hospitalized	Nasopharyngeal swab
hCoV-19/Iran/GRC-Zah-11-125/2021	EPI_ISL_2254723	2021-02-07	Asia / Iran / Zahedan	Male	38	unknown	Oropharyngeal swab
hCoV-19/Iran/GRC-Esf-11-171/2021	EPI_ISL_2350364	2021-02-17	Asia / Iran / Isfahan	Female	23	unknown	Nasopharyngeal and oropharyngeal swab
hCoV-19/Iran/GRC-Esf-11-173/2021	EPI_ISL_2352026	2021-02-16	Asia / Iran / Isfahan	Male	52	unknown	Nasopharyngeal and oropharyngeal swab
hCoV-19/Iran/Kerman-NIC-K1/2021	EPI_ISL_2360250	2021-05-08	Asia / Iran / Kerman	Male	25	Hospitalized	Throat swab
hCoV-19/Iran/Kerman-NIC-K2/2021	EPI_ISL_2360251	2021-05-08	Asia / Iran / Kerman	Male	26	Hospitalized	Throat swab
hCoV-19/Iran/Yazd-NIC-Y3/2021	EPI_ISL_2360252	2021-04-28	Asia / Iran / Yazd	Male	38	Outpatient	Throat swab
hCoV-19/Iran/Maku-NIC-M5/2021	EPI_ISL_2360253	2021-04-26	Asia / Iran / Maku	Male	40	Outpatient	Throat swab
hCoV-19/Iran/Yazd-NIC-Y6/2021	EPI_ISL_2360254	2021-04-28	Asia / Iran / Yazd	Male	43	Outpatient	Throat swab
hCoV-19/Iran/Hormozghan-NIC-B7/2021	EPI_ISL_2360255	2021-04-03	Asia / Iran / Hormozgan	Female	20	Outpatient	Throat swab
hCoV-19/Iran/Boshehr-NIC-P10/2021	EPI_ISL_2360256	2021-04-28	Asia / Iran / Boshehr	Male	21	Outpatient	Throat swab
hCoV-19/Iran/Boshehr-NIC-P11/2021	EPI_ISL_2360257	2021-04-28	Asia / Iran / Boshehr	Male	22	Outpatient	Throat swab
hCoV-19/Iran/GRC-Esf-11-174/2021	EPI_ISL_2364567	2021-02-17	Asia / Iran / Isfahan	Female	60	unknown	Nasopharyngeal and oropharyngeal swab
hCoV-19/Iran/GRC-T11747/2021	EPI_ISL_2365352	2021-02-14	Asia / Iran / Tehran	Female	60	unknown	Nasopharyngeal and oropharyngeal swab
hCoV-19/Iran/GRC-T11762/2021	EPI_ISL_2365353	2021-02-15	Asia / Iran / Tehran	Female	43	unknown	Nasopharyngeal and oropharyngeal swab
hCoV-19/Iran/GRC-T11763/2021	EPI_ISL_2365354	2021-02-15	Asia / Iran / Tehran	Female	15	unknown	Nasopharyngeal and oropharyngeal swab
hCoV-19/Iran/GRC-T11779/2021	EPI_ISL_2365355	2021-02-16	Asia / Iran / Tehran	Male	67	unknown	Nasopharyngeal and oropharyngeal swab
hCoV-19/Iran/GRC-T11800/2021	EPI_ISL_2365835	2021-02-16	Asia / Iran / Tehran	Male	23	unknown	Nasopharyngeal and oropharyngeal swab
hCoV-19/Iran/T11881/2021	EPI_ISL_2365857	2021-02-22	Asia / Iran / Tehran	Male	31	unknown	Nasopharyngeal and oropharyngeal swab
hCoV-19/Iran/GRC-T11479/2021	EPI_ISL_2447897	2021-01-27	Asia / Iran / Tehran	Male	32	unknown	Nasopharyngeal swab and oropharyngeal swab
hCoV-19/Iran/GRC-T11480/2021	EPI_ISL_2447986	2021-01-27	Asia / Iran / Tehran	Male	65	unknown	Nasopharyngeal swab and oropharyngeal swab
hCoV-19/Iran/GRC-T11488/2021	EPI_ISL_2447987	2021-01-30	Asia / Iran / Tehran	Male	70	unknown	Nasopharyngeal swab and oropharyngeal swab
hCoV-19/Iran/GRC-Q-11-102/2021	EPI_ISL_2455499	2021-02-08	Asia / Iran / Qazvin	Male	18	Hospitalized	Nasopharyngeal and oropharyngeal swab
hCoV-19/Iran/GRC-Q-11-103/2021	EPI_ISL_2455501	2021-02-09	Asia / Iran / Qazvin	Female	41	Hospitalized	Nasopharyngeal and oropharyngeal swab
hCoV-19/Iran/GRC-Q-11-108/2021	EPI_ISL_2455505	2021-02-07	Asia / Iran / Qazvin	Female	46	Hospitalized	Nasopharyngeal and oropharyngeal swab
hCoV-19/Iran/GRC-Q-11-109/2021	EPI_ISL_2455507	2021-02-01	Asia / Iran / Qazvin	Male	24	Hospitalized	Nasopharyngeal and oropharyngeal swab
hCoV-19/Iran/GRC-Sh-11-104/2021	EPI_ISL_2455556	2021-01-21	Asia / Iran / Shiraz	Male	68	Hospitalized	Nasopharyngeal swab
hCoV-19/Iran/GRC-Sh-11-106/2021	EPI_ISL_2455557	2021-01-28	Asia / Iran / Shiraz	Male	69	Hospitalized	Nasopharyngeal swab
hCoV-19/Iran/GRC-Sh-11-107/2021	EPI_ISL_2455558	2021-01-24	Asia / Iran / Shiraz	Male	60	Hospitalized	Nasopharyngeal swab
hCoV-19/Iran/3279/2020	EPI_ISL_2466656	2020-12-05	Asia / Iran	unknown	unknown	unknown	Throat swab
hCoV-19/Iran/3533/2020	EPI_ISL_2466657	2020-10-10	Asia / Iran	unknown	unknown	unknown	Throat swab
hCoV-19/Iran/4058/2020	EPI_ISL_2466658	2020-09-25	Asia / Iran	unknown	unknown	unknown	Throat swab
hCoV-19/Iran/GRC-T11516/2021	EPI_ISL_2499960	2021-02-01	Asia / Iran / Tehran	Female	71	unknown	Nasopharyngeal and oropharyngeal swab
hCoV-19/Iran/GRC-T11526/2021	EPI_ISL_2499968	2021-02-01	Asia / Iran / Tehran	Female	64	unknown	Nasopharyngeal and oropharyngeal swab
hCoV-19/Iran/GRC-T11560/2021	EPI_ISL_2499970	2021-02-03	Asia / Iran / Tehran	Male	26	unknown	Nasopharyngeal and oropharyngeal swab
hCoV-19/Iran/GRC-T11584/2021	EPI_ISL_2500015	2021-02-03	Asia / Iran / Tehran	Female	42	unknown	Nasopharyngeal and oropharyngeal swab
hCoV-19/Iran/GRC-Krj-12-103/2021	EPI_ISL_2536155	2021-02-20	Asia / Iran / Karaj	Male	48	Hospitalized	Nasopharyngeal and oropharyngeal swab
hCoV-19/Iran/GRC-Krj-12-105/2021	EPI_ISL_2536156	2021-02-20	Asia / Iran / Karaj	Male	69	Hospitalized	Nasopharyngeal and oropharyngeal swab
hCoV-19/Iran/GRC-Krj-12-107/2021	EPI_ISL_2536157	2021-02-20	Asia / Iran / karaj	Male	35	Hospitalized	Nasopharyngeal and oropharyngeal swab
hCoV-19/Iran/GRC-Krj-12-108/2021	EPI_ISL_2536158	2021-02-20	Asia / Iran / karaj	Female	73	Deceased	Nasopharyngeal and oropharyngeal swab
hCoV-19/Iran/GRC-Krj-12-111/2021	EPI_ISL_2536160	2021-02-22	Asia / Iran / Karaj	Female	78	Hospitalized(ICU)	Nasopharyngeal and oropharyngeal swab
hCoV-19/Iran/GRC-Krj-12-112/2021	EPI_ISL_2536181	2021-02-23	Asia / Iran / Karaj	Male	67	Deceased	Nasopharyngeal and oropharyngeal swab
hCoV-19/Iran/GRC-Krj-12-113/2021	EPI_ISL_2537078	2021-02-23	Asia / Iran / Karaj	Male	51	Hospitalized(ICU)	Nasopharyngeal and oropharyngeal swab
hCoV-19/Iran/GRC-Ahv-12-102/2021	EPI_ISL_2537387	2021-02-27	Asia / Iran / Ahvaz	Female	32	Hospitalized	Nasopharyngeal and oropharyngeal swab
hCoV-19/Iran/12624/2020	EPI_ISL_2537485	2020-04-28	Asia / Iran	unknown	unknown	unknown	Throat swab
hCoV-19/Iran/GRC-Ahv-12-105/2021	EPI_ISL_2547336	2021-02-28	Asia / Iran / Ahvaz	Male	47	Hospitalized	Nasopharyngeal and oropharyngeal swab
hCoV-19/Iran/GRC-Ahv-12-111/2021	EPI_ISL_2547337	2021-02-28	Asia / Iran / Ahvaz	Male	37	Hospitalized	Nasopharyngeal and oropharyngeal swab
hCoV-19/Iran/GRC-Ahv-12-120/2021	EPI_ISL_2547339	2021-03-01	Asia / Iran / Ahvaz	Female	29	Hospitalized	Nasopharyngeal and oropharyngeal swab
hCoV-19/Iran/GRC-Ahv-12-122/2021	EPI_ISL_2547428	2021-03-01	Asia / Iran / Ahvaz	Female	61	Hospitalized	Nasopharyngeal and oropharyngeal swab
hCoV-19/Iran/GRC-Ahv-12-124/2021	EPI_ISL_2547522	2021-03-01	Asia / Iran / Ahvaz	Female	42	Hospitalized	Nasopharyngeal and oropharyngeal swab
hCoV-19/Iran/GRC-GHOM-12-103/2021	EPI_ISL_2547523	2021-02-16	Asia / Iran / Qom	Male	41	unknown	Nasopharyngeal and oropharyngeal swab
hCoV-19/Iran/GRC-HAM-11-110/2021	EPI_ISL_2548847	2021-01-24	Asia / Iran / Hamadan	Male	50	Hospitalized	Nasopharyngeal and oropharyngeal swab
hCoV-19/Iran/GRC-2287/2020	EPI_ISL_2691710	2020-04-13	Asia / Iran / Tehran	Female	39	Hospitalized	Oropharyngeal swab
hCoV-19/Iran/GRC-4488/2020	EPI_ISL_2692885	2020-05-11	Asia / Iran / Rasht	Male	52	Hospitalized	Oropharyngeal swab
hCoV-19/Iran/GRC-6176/2020	EPI_ISL_2692888	2020-05-01	Asia / Iran / Rasht	Male	53	Hospitalized	Oropharyngeal swab
hCoV-19/Iran/GRC-6273/2020	EPI_ISL_2692890	2020-05-19	Asia / Iran / Ardabil	Female	42	Hospitalized	Oropharyngeal swab
hCoV-19/Iran/GRC-7773/2020	EPI_ISL_2692893	2020-06-20	Asia / Iran / Rasht	Female	30	Hospitalized	Oropharyngeal swab
hCoV-19/Iran/GRC-8557/2020	EPI_ISL_2692895	2020-06-01	Asia / Iran / Tehran	Female	31	Hospitalized	Oropharyngeal swab
hCoV-19/Iran/GRC-9136/2020	EPI_ISL_2692901	2020-06-07	Asia / Iran / Tehran	Male	74	Hospitalized	Oropharyngeal swab
hCoV-19/Iran/GRC-9204/2020	EPI_ISL_2692904	2020-05-17	Asia / Iran / Rasht	Male	65	Hospitalized	Oropharyngeal swab
hCoV-19/Iran/GRC-9473/2020	EPI_ISL_2692906	2020-06-10	Asia / Iran / Tehran	Male	42	Hospitalized	Oropharyngeal swab
hCoV-19/Iran/GRC-9635/2020	EPI_ISL_2692907	2020-06-11	Asia / Iran / Tehran	Male	63	Hospitalized	Oropharyngeal swab
hCoV-19/Iran/GRC-9842/2020	EPI_ISL_2692908	2020-07-13	Asia / Iran / Tehran	Male	29	Hospitalized	Oropharyngeal swab
hCoV-19/Iran/GRC-9933/2020	EPI_ISL_2692910	2020-07-15	Asia / Iran / Rasht	Male	43	Hospitalized	Oropharyngeal swab
hCoV-19/Iran/GRC-10074/2020	EPI_ISL_2692953	2020-07-16	Asia / Iran / Rasht	Male	21	Hospitalized	Oropharyngeal swab
hCoV-19/Iran/GRC-10306/2020	EPI_ISL_2692982	2020-06-15	Asia / Iran / Tehran	Female	62	Hospitalized	Oropharyngeal swab
hCoV-19/Iran/GRC-10356/2020	EPI_ISL_2692984	2020-06-15	Asia / Iran / Tehran	Male	45	Hospitalized	Oropharyngeal swab
hCoV-19/Iran/GRC-10532/2020	EPI_ISL_2692985	2020-06-16	Asia / Iran / Tehran	Male	45	Hospitalized	Oropharyngeal swab
hCoV-19/Iran/GRC-10617/2020	EPI_ISL_2692988	2020-06-16	Asia / Iran / Tehran	Male	57	Hospitalized	Oropharyngeal swab
hCoV-19/Iran/GRC-20/2020	EPI_ISL_2693672	2020-04-22	Asia / Iran / Ahvaz	Male	34	Hospitalized	Nasopharyngeal and oropharyngeal swab
hCoV-19/Iran/GRC-22/2020	EPI_ISL_2693673	2020-04-26	Asia / Iran / Ahvaz	Male	39	Hospitalized	Oropharyngeal swab
hCoV-19/Iran/GRC-32/2020	EPI_ISL_2693674	2020-04-30	Asia / Iran / Ahvaz	Male	33	Hospitalized	Oropharyngeal swab
hCoV-19/Iran/GRC-60/2020	EPI_ISL_2693675	2020-03-14	Asia / Iran / Alborz	Male	28	Hospitalized	Oropharyngeal swab
hCoV-19/Iran/GRC-63/2020	EPI_ISL_2693676	2020-04-20	Asia / Iran / Alborz	Male	36	Hospitalized	Oropharyngeal swab
hCoV-19/Iran/GRC-78/2020	EPI_ISL_2693905	2020-05-08	Asia / Iran / Zahedan	Female	44	Hospitalized	Nasopharyngeal and oropharyngeal swab
hCoV-19/Iran/GRC-81/2020	EPI_ISL_2693906	2020-05-08	Asia / Iran / Zahedan	Male	63	Hospitalized	Nasopharyngeal and oropharyngeal swab
hCoV-19/Iran/GRC-89/2020	EPI_ISL_2693907	2020-03-09	Asia / Iran / Birjand	Male	27	Hospitalized	Oropharyngeal swab
hCoV-19/Iran/GRC-3/2020	EPI_ISL_2693908	2020-03-24	Asia / Iran / Tehran	Female	44	Hospitalized	Oropharyngeal swab
hCoV-19/Iran/GRC-4/2020	EPI_ISL_2693972	2020-03-16	Asia / Iran / Tehran	Female	65	Hospitalized	Nasopharyngeal and oropharyngeal swab
hCoV-19/Iran/GRC-5/2020	EPI_ISL_2694195	2020-03-05	Asia / Iran / Tehran	Male	54	Hospitalized	Oropharyngeal swab
hCoV-19/Iran/GRC-6/2020	EPI_ISL_2694587	2020-03-18	Asia / Iran / Tehran	Male	67	Hospitalized	Oropharyngeal swab
hCoV-19/Iran/GRC-7/2020	EPI_ISL_2694588	2020-05-27	Asia / Iran / Tehran	Male	41	Hospitalized	Oropharyngeal swab
hCoV-19/Iran/GRC-8/2020	EPI_ISL_2694589	2020-05-20	Asia / Iran / Tehran	Male	46	Hospitalized	Oropharyngeal swab
hCoV-19/Iran/GRC-9/2020	EPI_ISL_2694590	2020-05-29	Asia / Iran / Tehran	Male	26	Hospitalized	Oropharyngeal swab
hCoV-19/Iran/GRC-10/2020	EPI_ISL_2694591	2020-05-17	Asia / Iran / Tehran	Female	59	Hospitalized	Oropharyngeal swab
hCoV-19/Iran/GRC-11/2020	EPI_ISL_2694592	2020-05-17	Asia / Iran / Tehran	Female	57	Hospitalized	Oropharyngeal swab
hCoV-19/Iran/GRC-T9778/2020	EPI_ISL_2697797	2020-11-04	Asia / Iran / Tehran	Male	31	unknown	Nasopharyngeal and oropharyngeal swab
hCoV-19/Iran/GRC-T9862/2020	EPI_ISL_2697882	2020-11-07	Asia / Iran / Tehran	Male	43	unknown	Nasopharyngeal and oropharyngeal swab
hCoV-19/Iran/GRC-T9972/2020	EPI_ISL_2698324	2020-11-10	Asia / Iran / Tehran	Male	93	unknown	Nasopharyngeal and oropharyngeal swab
hCoV-19/Iran/GRC-teh26124/2021	EPI_ISL_2699426	2021-01-29	Asia / Iran / Tehran	Female	58	unknown	Nasopharyngeal and oropharyngeal swab
hCoV-19/Iran/GRC-T9994/2020	EPI_ISL_2715364	2020-11-11	Asia / Iran / Tehran	Male	67	unknown	Nasopharyngeal and oropharyngeal swab
hCoV-19/Iran/T10013/2020	EPI_ISL_2715365	2020-11-13	Asia / Iran / Tehran	Female	67	unknown	Nasopharyngeal and Oropharyngeal swab
hCoV-19/Iran/GRC-T10020/2020	EPI_ISL_2715366	2020-11-12	Asia / Iran / Tehran	Female	63	unknown	Nasopharyngeal and oropharyngeal swab
hCoV-19/Iran/GRC-T10030/2020	EPI_ISL_2715367	2020-11-14	Asia / Iran / Tehran	Female	28	unknown	Nasopharyngeal and oropharyngeal swab
hCoV-19/Iran/GRC-T10247/2020	EPI_ISL_2716473	2020-11-21	Asia / Iran / Tehran	Male	33	unknown	Nasopharyngeal and oropharyngeal swab
hCoV-19/Iran/T10288/2020	EPI_ISL_2716475	2020-11-23	Asia / Iran / Tehran	Male	76	unknown	Nasopharyngeal and Oropharyngeal swab
hCoV-19/Iran/GRC-T10301/2020	EPI_ISL_2716476	2020-11-23	Asia / Iran / Tehran	Male	44	unknown	Nasopharyngeal and oropharyngeal swab
hCoV-19/Iran/GRC-T10303/2020	EPI_ISL_2716640	2020-11-23	Asia / Iran / Tehran	Male	56	unknown	Nasopharyngeal and oropharyngeal swab
hCoV-19/Iran/GRC-T10304/2020	EPI_ISL_2716724	2020-11-23	Asia / Iran / Tehran	Male	38	unknown	Nasopharyngeal and oropharyngeal swab
hCoV-19/Iran/T10313/2020	EPI_ISL_2716740	2020-11-24	Asia / Iran / Tehran	Male	51	unknown	Nasopharyngeal and Oropharyngeal swab
hCoV-19/Iran/GRC-T10338/2020	EPI_ISL_2716741	2020-11-25	Asia / Iran / Tehran	Female	30	unknown	Nasopharyngeal and oropharyngeal swab
hCoV-19/Iran/GRC-T10343/2020	EPI_ISL_2716742	2020-11-24	Asia / Iran / Tehran	Male	22	unknown	Nasopharyngeal and oropharyngeal swab
hCoV-19/Iran/GRC-T10467/2020	EPI_ISL_2716834	2020-11-28	Asia / Iran / Tehran	Male	62	unknown	Nasopharyngeal and oropharyngeal swab
hCoV-19/Iran/GRC-T10709/2020	EPI_ISL_2716836	2020-12-12	Asia / Iran / Tehran	Male	32	unknown	Nasopharyngeal and oropharyngeal swab
hCoV-19/Iran/GRC-T10716/2020	EPI_ISL_2716837	2020-12-12	Asia / Iran / Tehran	Female	39	unknown	Nasopharyngeal and oropharyngeal swab
hCoV-19/Iran/GRC-T10749/2020	EPI_ISL_2716838	2020-12-15	Asia / Iran / Tehran	Female	27	unknown	Nasopharyngeal and oropharyngeal swab
hCoV-19/Iran/GRC-T10808/2020	EPI_ISL_2716954	2020-12-12	Asia / Iran / Tehran	Male	39	unknown	Nasopharyngeal and oropharyngeal swab
hCoV-19/Iran/GRC-T10822/2020	EPI_ISL_2727647	2020-12-12	Asia / Iran / Tehran	Female	12	unknown	Nasopharyngeal and oropharyngeal swab
hCoV-19/Iran/GRC-T10836/2020	EPI_ISL_2727648	2020-12-20	Asia / Iran / Tehran	Male	31	unknown	Nasopharyngeal and oropharyngeal swab
hCoV-19/Iran/T10889/2020	EPI_ISL_2727649	2020-12-23	Asia / Iran / Tehran	Female	28	unknown	Nasopharyngeal and Oropharyngeal swab
hCoV-19/Iran/GRC-T10934/2020	EPI_ISL_2727650	2020-12-26	Asia / Iran / Tehran	Male	41	unknown	Nasopharyngeal and oropharyngeal swab
hCoV-19/Iran/GRC-T10952/2020	EPI_ISL_2727652	2020-12-27	Asia / Iran / Tehran	Male	36	unknown	Nasopharyngeal and oropharyngeal swab
hCoV-19/Iran/T11093/2021	EPI_ISL_2727655	2021-01-06	Asia / Iran / Tehran	Female	33	unknown	Nasopharyngeal and Oropharyngeal swab
hCoV-19/Iran/GRC-T11095/2021	EPI_ISL_2727657	2021-01-05	Asia / Iran / Tehran	Female	51	unknown	Nasopharyngeal and oropharyngeal swab
hCoV-19/Iran/GRC-T11100/2021	EPI_ISL_2727668	2021-01-05	Asia / Iran / Tehran	Male	41	unknown	Nasopharyngeal and oropharyngeal swab
hCoV-19/Iran/T11101/2021	EPI_ISL_2727669	2021-01-06	Asia / Iran / Tehran	Female	29	unknown	Oropharyngeal and Nasopharyngeal swab
hCoV-19/Iran/GRC-T11124/2021	EPI_ISL_2727670	2021-01-05	Asia / Iran / Tehran	Male	58	unknown	Nasopharyngeal and oropharyngeal swab
hCoV-19/Iran/GRC-33305/2020	EPI_ISL_2727671	2020-12-07	Asia / Iran / Qazvin	Male	80	unknown	Nasopharyngeal and oropharyngeal swab
hCoV-19/Iran/GRC-33316/2020	EPI_ISL_2727672	2020-12-05	Asia / Iran / Qazvin	Male	48	unknown	Nasopharyngeal and oropharyngeal swab
hCoV-19/Iran/GRC-G33337/2020	EPI_ISL_2727799	2020-12-06	Asia / Iran / Qazvin	Male	36	unknown	Nasopharyngeal and oropharyngeal swab
hCoV-19/Iran/GRC-G33487/2020	EPI_ISL_2727874	2020-12-07	Asia / Iran / Qazvin	Female	31	unknown	Oropharyngeal swab
hCoV-19/Iran/GRC-G33558/2020	EPI_ISL_2727875	2020-12-08	Asia / Iran / Qazvin	Male	89	unknown	Nasopharyngeal and oropharyngeal swab
hCoV-19/Iran/GRC-G33954/2020	EPI_ISL_2727889	2020-12-09	Asia / Iran / Qazvin	Female	73	unknown	Nasopharyngeal and oropharyngeal swab
hCoV-19/Iran/GRC-7202B/2021	EPI_ISL_2795653	2021-01-27	Asia / Iran / Babol	Female	71	Hospitalized	Nasopharyngeal and oropharyngeal swab
hCoV-19/Iran/GRC-7264B/2021	EPI_ISL_2795654	2021-01-27	Asia / Iran / Babol	Female	68	Hospitalized	Nasopharyngeal and oropharyngeal swab
hCoV-19/Iran/GRC-7334B/2021	EPI_ISL_2795656	2021-01-27	Asia / Iran / Babol	Female	68	Hospitalized	Nasopharyngeal and oropharyngeal swab
hCoV-19/Iran/GRC-T-I-11-101/2021	EPI_ISL_2795659	2021-01-31	Asia / Iran / Tehran	Male	57	unknown	Nasopharyngeal and oropharyngeal swab
hCoV-19/Iran/GRC-T-I-11-102/2021	EPI_ISL_2795660	2021-01-31	Asia / Iran / Tehran	Male	39	unknown	Nasopharyngeal and oropharyngeal swab
hCoV-19/Iran/T.I.11.111/2021	EPI_ISL_2795673	2021-02-01	Asia / Iran / Tehran	Male	41	unknown	Nasopharyngeal and oropharyngeal swab
hCoV-19/Iran/GRC-T-I-11-113/2021	EPI_ISL_2795674	2021-01-31	Asia / Iran / Tehran	Male	60	unknown	Nasopharyngeal and oropharyngeal swab
hCoV-19/Iran/GRC-T-I-11-114/2021	EPI_ISL_2795675	2021-01-31	Asia / Iran / Tehran	Female	34	unknown	Nasopharyngeal and oropharyngeal swab
hCoV-19/Iran/GRC-T-I-11-115/2021	EPI_ISL_2795676	2021-01-31	Asia / Iran / Tehran	Female	69	unknown	Nasopharyngeal and oropharyngeal swab
hCoV-19/Iran/GRC-T-I-11-116/2021	EPI_ISL_2795677	2021-01-30	Asia / Iran / Tehran	Female	77	unknown	Nasopharyngeal and oropharyngeal swab
hCoV-19/Iran/GRC-T-I-11-117/2021	EPI_ISL_2795678	2021-01-30	Asia / Iran / Tehran	Male	41	unknown	Nasopharyngeal and oropharyngeal swab
hCoV-19/Iran/GRC-T-I-11-118/2021	EPI_ISL_2795679	2021-01-30	Asia / Iran / Tehran	Male	28	unknown	Nasopharyngeal and oropharyngeal swab
hCoV-19/Iran/GRC-T-I-11-119/2021	EPI_ISL_2795680	2021-01-30	Asia / Iran / Tehran	Male	28	unknown	Nasopharyngeal and oropharyngeal swab
hCoV-19/Iran/GRC-T-I-11-120/2021	EPI_ISL_2795920	2021-02-01	Asia / Iran / Tehran	Male	52	unknown	Nasopharyngeal and oropharyngeal swab
hCoV-19/Iran/GRC-T-I-11-121/2021	EPI_ISL_2795966	2021-02-01	Asia / Iran / Tehran	Female	63	unknown	Nasopharyngeal and oropharyngeal swab
hCoV-19/Iran/GRC-T-I-11-122/2021	EPI_ISL_2795967	2021-02-01	Asia / Iran / Tehran	Male	34	unknown	Nasopharyngeal and oropharyngeal swab
hCoV-19/Iran/GRC-T-I-11-124/2021	EPI_ISL_2796504	2021-02-01	Asia / Iran / Tehran	Female	58	unknown	Nasopharyngeal and oropharyngeal swab
hCoV-19/Iran/GRC-T-I-11-125/2021	EPI_ISL_2796505	2021-02-01	Asia / Iran / Tehran	Female	33	unknown	Nasopharyngeal and oropharyngeal swab
hCoV-19/Iran/GRC-T-I-11-126/2021	EPI_ISL_2796506	2021-02-01	Asia / Iran / Tehran	Male	33	unknown	Nasopharyngeal and oropharyngeal swab
hCoV-19/Iran/T-I-11-127/2021	EPI_ISL_2796507	2021-02-02	Asia / Iran / Tehran	Female	17	unknown	Nasopharyngeal and oropharyngeal swab
hCoV-19/Iran/GRC-RNA E2-N192/2021	EPI_ISL_2835952	2021-01	Asia / Iran / Tehran	Female	19	unknown	Nasopharyngeal swab and oropharyngeal swab
hCoV-19/Iran/GRC-RNAE3-N193/2021	EPI_ISL_2835953	2021-01	Asia / Iran / Tehran	Male	16	unknown	Nasopharyngeal swab and oropharyngeal swab
hCoV-19/Iran/GRC-T9258/2020	EPI_ISL_2835993	2020-10-14	Asia / Iran / Tehran	Male	65	unknown	Nasopharyngeal swab and oropharyngeal swab
hCoV-19/Iran/GRC-S8778/2021	EPI_ISL_2836970	2021-01	Asia / Iran / Sari	Female	60	Hospitalized	Nasopharyngeal swab and oropharyngeal swab
hCoV-19/Iran/GRC-S8935/2021	EPI_ISL_2836971	2021-01	Asia / Iran / Sari	Female	79	Hospitalized	Nasopharyngeal swab and oropharyngeal swab
hCoV-19/Iran/GRC-S8939/2021	EPI_ISL_2837247	2021-01	Asia / Iran / Sari	Female	45	Hospitalized	Nasopharyngeal swab and oropharyngeal swab
hCoV-19/Iran/GRC-S8948/2021	EPI_ISL_2838053	2021-01	Asia / Iran / Sari	Male	56	Hospitalized	Nasopharyngeal swab and oropharyngeal swab
hCoV-19/Iran/GRC-S8957/2021	EPI_ISL_2838054	2021-01	Asia / Iran / Sari	Male	64	Hospitalized	Nasopharyngeal swab and oropharyngeal swab
hCoV-19/Iran/GRC-S8958/2021	EPI_ISL_2838055	2021-01	Asia / Iran / Sari	Female	72	Hospitalized	Nasopharyngeal swab and oropharyngeal swab
hCoV-19/Iran/GRC-S8963/2021	EPI_ISL_2838353	2021-01	Asia / Iran / Sari	Female	65	Hospitalized	Nasopharyngeal swab and oropharyngeal swab
hCoV-19/Iran/GRC-T9129/2020	EPI_ISL_2838791	2020-10-11	Asia / Iran / Tehran	Male	51	unknown	Nasopharyngeal swab and oropharyngeal swab
hCoV-19/Iran/GRC-T-I-11-108/2021	EPI_ISL_2988732	2021-01-31	Asia / Iran / Tehran	Female	56	unknown	Nasopharyngeal swab and oropharyngeal swab
hCoV-19/Iran/GRC-T11156/2021	EPI_ISL_2992049	2021-01-06	Asia / Iran / Tehran	Male	39	unknown	Nasopharyngeal and oropharyngeal swab
hCoV-19/Iran/GRC-T-I-11-182/2021	EPI_ISL_3038897	2021-02-12	Asia / Iran / Tehran	Male	40	unknown	Nasopharyngeal and oropharyngeal swab
hCoV-19/Iran/GRC-T-I-11-185/2021	EPI_ISL_3038900	2021-02-12	Asia / Iran / Tehran	Male	48	unknown	Nasopharyngeal and oropharyngeal swab
hCoV-19/Iran/GRC-T-I-11-186/2021	EPI_ISL_3038901	2021-02-12	Asia / Iran / Tehran	Male	36	unknown	Nasopharyngeal and oropharyngeal swab
hCoV-19/Iran/GRC-T-I-11-187/2021	EPI_ISL_3038902	2021-02-12	Asia / Iran / Tehran	Female	42	unknown	Nasopharyngeal and oropharyngeal swab
hCoV-19/Iran/GRC-teh9/2021	EPI_ISL_3053154	2021-01	Asia / Iran / Tehran	Female	25	unknown	Nasopharyngeal and oropharyngeal swab
hCoV-19/Iran/GRC-teh10/2021	EPI_ISL_3053821	2021-01	Asia / Iran / Tehran	Female	29	Hospitalized	Nasopharyngeal and oropharyngeal swab
hCoV-19/Iran/GRC-teh15/2021	EPI_ISL_3053822	2021-01	Asia / Iran / Tehran	Male	18	unknown	Nasopharyngeal and oropharyngeal swab
hCoV-19/Iran/GRC-teh6/2021	EPI_ISL_3053824	2021-01	Asia / Iran / Tehran	Male	26	Hospitalized	Nasopharyngeal and oropharyngeal swab
hCoV-19/Iran/GRC-teh5/2021	EPI_ISL_3053825	2021-01	Asia / Iran / Tehran	Female	37	unknown	Nasopharyngeal and oropharyngeal swab
hCoV-19/Iran/GRC-S8954/2021	EPI_ISL_3053831	2021-01	Asia / Iran / Sari	Male	41	Hospitalized	Nasopharyngeal and oropharyngeal swab
hCoV-19/Iran/GRC-S8962/2021	EPI_ISL_3053832	2021-01	Asia / Iran / Sari	Female	59	Hospitalized	Nasopharyngeal and oropharyngeal swab
hCoV-19/Iran/GRC-S9050/2021	EPI_ISL_3055258	2021-01	Asia / Iran / Sari	Female	57	Hospitalized	Nasopharyngeal and oropharyngeal swab
hCoV-19/Iran/GRC-T-I-11-109/2021	EPI_ISL_3055330	2021-01-31	Asia / Iran / Tehran	Male	47	unknown	Nasopharyngeal and oropharyngeal swab
hCoV-19/Iran/GRC-T11241/2021	EPI_ISL_3068588	2021-01-11	Asia / Iran / Tehran	Female	42	unknown	Nasopharyngeal swab, Oropharyngeal swab
hCoV-19/Iran/GRC-TA37/2021	EPI_ISL_3070765	2021-01	Asia / Iran / Tabriz	Male	58	Hospitalized	Nasopharyngeal swab, Oropharyngeal swab
hCoV-19/Iran/GRC-TA43/2021	EPI_ISL_3070766	2021-01	Asia / Iran / Tabriz	Male	70	Hospitalized	Nasopharyngeal swab, Oropharyngeal swab
hCoV-19/Iran/GRC-TA35/2021	EPI_ISL_3070767	2021-01	Asia / Iran / Tabriz	Female	69	Hospitalized	Nasopharyngeal swab, Oropharyngeal swab
hCoV-19/Iran/GRC-TA18/2021	EPI_ISL_3070768	2021-01	Asia / Iran / Tabriz	Male	55	unknown	Nasopharyngeal swab, Oropharyngeal swab
hCoV-19/Iran/GRC-TA52/2021	EPI_ISL_3070769	2021-01	Asia / Iran / Tabriz	Male	65	Deceased	Nasopharyngeal swab, Oropharyngeal swab
hCoV-19/Iran/GRC-teh17/2021	EPI_ISL_3070773	2021-01	Asia / Iran / Tehran	Male	60	Hospitalized	Nasopharyngeal swab, Oropharyngeal swab
hCoV-19/Iran/GRC-teh21/2021	EPI_ISL_3070774	2021-01	Asia / Iran / Tehran	Female	42	unknown	Nasopharyngeal swab, Oropharyngeal swab
hCoV-19/Iran/GRC-TA22/2021	EPI_ISL_3076920	2021-01	Asia / Iran / Tabriz	Male	43	Hospitalized	Nasopharyngeal and oropharyngeal swab
hCoV-19/Iran/GRC-S9047/2021	EPI_ISL_3076928	2021-01	Asia / Iran / Sari	Male	35	Hospitalized	Nasopharyngeal and oropharyngeal swab
hCoV-19/Iran/GRC-S9049/2021	EPI_ISL_3076934	2021-01	Asia / Iran / Sari	Male	42	Hospitalized	Nasopharyngeal and oropharyngeal swab
hCoV-19/Iran/GRC-39982/2021	EPI_ISL_3076944	2021-01-07	Asia / Iran / Qazvin	Male	64	unknown	Nasopharyngeal and oropharyngeal swab
hCoV-19/Iran/GRC-40017/2021	EPI_ISL_3077450	2021-01-07	Asia / Iran / Qazvin	Male	48	unknown	Nasopharyngeal and oropharyngeal swab
hCoV-19/Iran/GRC-40072/2021	EPI_ISL_3078071	2021-01-08	Asia / Iran / Qazvin	Male	26	unknown	Nasopharyngeal and oropharyngeal swab
hCoV-19/Iran/GRC-40161/2021	EPI_ISL_3078875	2021-01-08	Asia / Iran / Qazvin	Male	38	unknown	Nasopharyngeal and oropharyngeal swab
hCoV-19/Iran/GRC-B3/2021	EPI_ISL_3084571	2021-01	Asia / Iran / Birjand	Female	30	Hospitalized (Mild)	Nasopharyngeal and oropharyngeal swab
hCoV-19/Iran/GRC-B62/2021	EPI_ISL_3084572	2021-01	Asia / Iran / Birjand	Female	84	Deceased	Nasopharyngeal and oropharyngeal swab
hCoV-19/Iran/GRC-B7-5-10/2021	EPI_ISL_3084574	2021-01	Asia / Iran / Birjand	Female	54	Hospitalized (Moderate)	Nasopharyngeal and oropharyngeal swab
hCoV-19/Iran/GRC-B54/2021	EPI_ISL_3084577	2021-01	Asia / Iran / Birjand	Male	44	Hospitalized (Moderate)	Nasopharyngeal and oropharyngeal swab
hCoV-19/Iran/GRC-B56/2021	EPI_ISL_3085315	2021-01	Asia / Iran / Birjand	Female	59	Hospitalized (Mild)	Nasopharyngeal and oropharyngeal swab
hCoV-19/Iran/GRC-B66-16-10/2021	EPI_ISL_3085358	2021-01	Asia / Iran / Birjand	Male	53	unknown	Nasopharyngeal and oropharyngeal swab
hCoV-19/Iran/GRC-B74/2021	EPI_ISL_3085745	2021-01	Asia / Iran / Birjand	Female	24	Hospitalized (Mild)	Nasopharyngeal and oropharyngeal swab
hCoV-19/Iran/GRC-G0-Aa18/2021	EPI_ISL_3085825	2021-01	Asia / Iran / Gorgan	Male	63	Hospitalized	Nasopharyngeal swab
hCoV-19/Iran/GRC-teh26160/2021	EPI_ISL_3085877	2021-01-29	Asia / Iran / Tehran	Male	11	unknown	Nasopharyngeal and oropharyngeal swab
hCoV-19/Iran/GRC-teh26197/2021	EPI_ISL_3085878	2021-01-29	Asia / Iran / Tehran	Male	29	Hospitalized	Nasopharyngeal and oropharyngeal swab
hCoV-19/Iran/HGRC-2-2162/2020	EPI_ISL_437512	2020-03-26	Asia / Iran	unknown	unknown	unknown	Throat swab
hCoV-19/Iran/KHGRC-2-2162/2020	EPI_ISL_442044	2020-03-26	Asia / Iran / Tehran	unknown	unknown	Hospitalized	Throat swab
hCoV-19/Iran/KHGRC-1.1-IPI-8206/2020	EPI_ISL_442523	2020-03-09	Asia / Iran / Semnan	unknown	unknown	Hospitalized
hCoV-19/Iran/Maragheh-NIC-S2/2021	EPI_ISL_4803528	2021-08-02	Asia / Iran	Male	47	Hospitalized	Throat swab
hCoV-19/Iran/Ardakan-NIC-S5/2021	EPI_ISL_4803538	2021-09-03	Asia / Iran	Female	unknwon	unknown	Throat swab
hCoV-19/Iran/North Khorasan-NIC-S6/2021	EPI_ISL_4803554	2021-08-29	Asia / Iran	Female	39	Outpatient	Throat swab
hCoV-19/Iran/Tehran-NIC-S7/2021	EPI_ISL_4803556	2021-07-19	Asia / Iran	Female	unknwon	Outpatient	Throat swab
hCoV-19/Iran/Ahvaz-NIC-S8/2021	EPI_ISL_4803557	2021-08-02	Asia / Iran	Male	52	Hospitalized	Throat swab
hCoV-19/Iran/Ahvaz-NIC-S9/2021	EPI_ISL_4803558	2021-08-04	Asia / Iran	Male	46	Expired	Throat swab
hCoV-19/Iran/IRVSH-2/2020	EPI_ISL_514753	2020-05-01	Asia / Iran / Tehran	unknown	unknown	unknown	Nasal swab
hCoV-19/Iran/GRC-1600/2020	EPI_ISL_582033	2020-04-03	Asia / Iran / Tehran	Male	53	Hospitalized	Oropharyngeal swab
hCoV-19/Iran/GRC-2297/2020	EPI_ISL_594185	2020-04-13	Asia / Iran / Tehran	Male	31	Hospitalized	Oropharyngeal swab
hCoV-19/Iran/GRC-1325/2020	EPI_ISL_594186	2020-03-28	Asia / Iran / Tehran	Female	47	Hospitalized	Oropharyngeal swab
hCoV-19/Iran/GRC-2024/2020	EPI_ISL_594187	2020-04-11	Asia / Iran / Tehran	Male	58	Hospitalized	Oropharyngeal swab
hCoV-19/Iran/GRC-7650/2020	EPI_ISL_594188	2020-06-26	Asia / Iran / Tehran	Female	23	Hospitalized	Oropharyngeal swab
hCoV-19/Iran/GRC-10582/2020	EPI_ISL_596451	2020-06-16	Asia / Iran / Tehran	Female	28	Hospitalized	Oropharyngeal swab
hCoV-19/Iran/GRC-43/2020	EPI_ISL_596453	2020-03-02	Asia / Iran / Qom	Female	53	Hospitalized	Oropharyngeal swab
hCoV-19/Iran/GRC-70/2020	EPI_ISL_596454	2020-03-08	Asia / Iran / Zahedan	Male	42	Hospitalized	Nasopharyngeal and oropharyngeal swab
hCoV-19/Iran/GRC-9695/2020	EPI_ISL_596455	2020-06-11	Asia / Iran / Tehran	Female	66	Hospitalized	Oropharyngeal swab
hCoV-19/Iran/Q100/2020	EPI_ISL_637099	2020-03-10	Asia / Iran	Male	55	unknown	Nasal and throat swab
hCoV-19/Iran/NIV-P1-Q100/2020	EPI_ISL_637100	2020-03-10	Asia / Iran	Male	55	unknown
hCoV-19/Iran/NIV-P2-Q100/2020	EPI_ISL_637101	2020-03-10	Asia / Iran	Male	55	unknown
hCoV-19/Iran/NIV-P1-Q111/2020	EPI_ISL_637103	2020-03-10	Asia / Iran	Female	52	unknown
hCoV-19/Iran/NIV-P2-Q111/2020	EPI_ISL_637104	2020-03-10	Asia / Iran	Female	52	unknown
hCoV-19/Iran/Cento-37431805/2020	EPI_ISL_815256	2020-07-16	Asia / Iran / Karaj	Female	51	unknown	Oropharyngeal swab
hCoV-19/Iran/N193/2021	EPI_ISL_833578	2021-01-08	Asia / Iran / Tehran	Male	51	Mild Sympthoms	Nasopharyngeal and oropharyngeal swab
hCoV-19/Iran/Tehran-06/2020	EPI_ISL_862075	2020-11-10	Asia / Iran / Tehran	Female	75	Hospitalized	Throat swab
hCoV-19/Iran/Tehran-02/2020	EPI_ISL_862076	2020-11-24	Asia / Iran / Tehran	Female	52	Outpatient	Throat swab
hCoV-19/Iran/Tehran-09/2020	EPI_ISL_862077	2020-02-20	Asia / Iran / Tehran	Male	25	Hospitalized	Throat swab
hCoV-19/Iran/Tehran-08/2020	EPI_ISL_862078	2020-02-20	Asia / Iran / Tehran	Male	unknown	Hospitalized	Throat swab
hCoV-19/Iran/Tehran-04/2020	EPI_ISL_862079	2020-11-05	Asia / Iran / Tehran	Female	45	Hospitalized	Throat swab
hCoV-19/Iran/Tehran-03/2020	EPI_ISL_862080	2020-11-25	Asia / Iran / Tehran	Female	unknown	Outpatient	Throat swab
hCoV-19/Iran/Tehran-01/2020	EPI_ISL_862081	2020-11-24	Asia / Iran / Tehran	Male	unknown	Hospitalized	Throat swab
hCoV-19/Iran/Gorgan-NIC992/2020	EPI_ISL_959275	2020-04-06	Asia / Iran / Gorgan	unknown	unknown	Hospitalized	Throat swab
hCoV-19/Iran/Gorgan-NIC118/2020	EPI_ISL_959276	2020-04-06	Asia / Iran / Gorgan	unknown	unknown	Hospitalized	Throat swab
hCoV-19/Iran/Gilan-NIC230/2020	EPI_ISL_959277	2020-08-20	Asia / Iran / Gilan	Female	unknown	Outpatient	Throat swab
hCoV-19/Iran/Gilan-NIC184/2020	EPI_ISL_959278	2020-08-18	Asia / Iran / Gilan	Male	unknown	Outpatient	Throat swab
hCoV-19/Iran/Tehran-NIC45RC/2020	EPI_ISL_959279	2020-11-05	Asia / Iran / Tehran	Male	unknown	Hospitalized	Throat swab
hCoV-19/Iran/Gorgan-NIC028/2020	EPI_ISL_959280	2020-04-06	Asia / Iran / Gorgan	unknown	unknown	Hospitalized	Throat swab
hCoV-19/Iran/Gilan-NICS1-58/2020	EPI_ISL_959281	2020-08-22	Asia / Iran / Gilan	Male	unknown	Hospitalized	Throat swab
hCoV-19/Iran/Gilan-NIC189/2020	EPI_ISL_959282	2020-07-02	Asia / Iran / Gilan	Female	unknown	Outpatient	Throat swab
hCoV-19/Iran/Gorgan-NIC140/2020	EPI_ISL_959283	2020-04-06	Asia / Iran / Gorgan	unknown	unknown	Hospitalized	Throat swab
hCoV-19/Iran/Tehran-NIC12RC/2020	EPI_ISL_959284	2020-11-05	Asia / Iran / Tehran	Male	unknown	Hospitalized	Throat swab
