# Supplementary material for: Variation analysis of SARS-CoV-2 complete sequences from Iran
Source: Future Virol. 2022 Oct 22:10.2217/fvl-2021-0056. doi: 10.2217/fvl-2021-0056 (PMC9594980; doi:10.2217/fvl-2021-0056)
Supplement: Supplementary file 2 [file Supplementary_table_2.xlsx]

## Sheet: Sheet1
5’UTR	Frequency	ORF1ab	Frequency	S	Frequency	ORF3	Frequency	E	Frequency	M	Frequency	ORF6	Frequency	ORF7	Frequency	ORF8	Frequency	N	Frequency	ORF10*	Frequency	3’UTR	Frequency	Non-coding	Frequency
C241T	215	C3037T	214	A23403G	224	G25563T	78	C26256T	2	C26735T	65	T27384C	6	C27641T	21	C27972T	51	G28881A	220	C29614T	3	G29742T	77	C29555T	2
G210T	18	C14408T	214	C22444T	67	C25469T	17	C26456T	2	A26741G	56	C27263T	1	C27874T	18	A28111G	47	G28882A	220	C29666T	1	G29734C	7	C29541T	2
G204C	5	C18877T	69	G22992A	57	C26060T	12	C26388T	1	T26767C	16	C27213T	1	C27752T	16	G28048T	32	G28883C	220	C29627T	1	C29738T	5	C27889T	2
C203T	3	G11083T	63	G21974T	56	A26059G	7	C26461T	1	C27092T	4	T27346C	1	T27638C	14	A28095T	19	T28688C	118			G29690T	2	A28272G	2
C140T	1	G1397A	60	A23063T	45	G25785T	6	C26270T	1	C26801T	3	C27294T	1	C27881T	8	C28253T	8	C28977T	110			G29747T	2	C29545A	1
C147T	1	A604G	60	C23271A	43	C25904T	5	C26250T	1	A27144T	2	G27281T	1	C27509T	4	G28079T	3	C28291T	106			G29706T	2	G29543T	1
G219T	1	G13849T	58	T24506G	43	G25726T	5	G26428T	1	C27046T	1			G27788T	3	G28077T	2	C28854T	67			G29736T	2	T26504C	1
G188T	1	C3096T	55	C23604A	42	G25690T	5	C26447T	1	G26720T	1			G27870T	3	T28196C	2	C29311T	50			G29736C	1	G26501T	1
G105T	1	A19020T	55	C23709T	42	G25644T	3			C27145T	1			C27739T	2	G28001T	2	T28282A	47			G29744C	1	G29742A	1
C241A	1	C913T	44	G24914C	42	C25728T	3			A26927G	1			C27434T	2	C27903T	1	A28281T	47			C29675T	1
A258C	1	C15279T	43	G24410A	17	A25439C	3			G26690T	1			C27661T	2	G27916T	1	G28280C	47			G29688T	1
		C14676T	42	C23604G	17	C25797A	2			G27112C	1			T27539C	2	G28027C	1	G28881T	32			C29743T	1
		C3267T	42	C23657A	17	G26211T	2			C26681T	1			C27542A	2	G28202T	1	G28975T	30			G29711C	1
		C5986T	42	T21861C	17	C25844T	2			T26960C	1			G27544C	2	T27919C	1	G29402T	15			T29681C	1
		T6954C	42	C21618G	16	C26111T	2			C26882T	1			C27707T	1	C27982T	1	A28461G	15
		T16176C	42	C22995A	16	C25614T	2			G26909T	1			C27476T	1	T28196C	1	C28830T	14
		C5388A	38	G21987A	14	G25677T	2			C26895A	1			A27400C	1	A28104G	1	C28310A	12
		G15451A	32	T22917G	14	C25721T	2			G26526T	1			T27875C	1	G28028A	1	G28916T	12
		T15096C	25	C21846T	12	T25713C	2			C27110T	1			G27621T	1	G27916A	1	T28297C	8
		A11211G	24	C21627T	8	C26058T	2			C26985T	1			C27649A	1	T28067A	1	G28373T	8
		C12830A	18	G25166C	5	G26104T	2			C26822T	1			G27798A	1	T28004C	1	G28280T	7
		C6402T	17	C21575T	4	C25513T	2			G26755A	1			A27552G	1	C27970T	1	C28432T	7
		C884T	15	C23277T	4	G25445T	1			C26622T	1			T27432C	1	C27925T	1	C28932T	7
		G8653T	15	C22735T	4	G26153T	1			C27002T	1			C27725T	1	G28209T	1	T29524C	6
		G4181T	14	C22227T	4	A25564G	1			C26907T	1			G27870C	1	G28162T	1	C28849G	5
		C7124T	14	C21727T	3	G25855T	1			T26870C	1			G27806T	1	G28048A	1	G29449T	4
		C8986T	14	C23525T	3	G25769A	1			C26936T	1			,C27804T	1	G28456A	1	G28899T	4
		A11201G	14	C21658T	3	G25922T	1			T26816C	1			G27621A	1	T28144C	1	C29149T	4
		C19220T	14	A23586G	3	C25517T	1			C27131T	1			G27467A	1	G28167A	1	C28320T	4
		G9053T	13	G23593T	3	T25779A	1			C26537T	1			T27483C	1	C27920T	1	G28346T	4
		C10029T	13	C22987T	3	C25782T	1			C26607T	1			T27435C	1			C28887T	4
		A11332G	13	C21910T	3	A26148T	1			C26750A	1			C27559T	1			C28377T	3
		C16466T	12	A24110C	3	G26062T	1			C26801G	1			G27798T	1			C28905T	3
		A20268G	10	T25330A	2	C26176T	1											G29374A	2
		C17690T	9	G22100A	2	C26022T	1											C29160T	2
		C7765T	8	A23476G	2	A25442G	1											C29358T	2
		A9469G	8	T22795G	2	A25910G	1											C28824T	2
		G21123T	8	C24138A	2	C25708T	1											G28883A	2
		A17615G	8	C25006T	2	T25705C	1											G29195T	2
		C17104T	7	C21757T	2	C25549T	1											C28311T	2
		G20887A	7	G23587T	2	C25919T	1											C28344T	2
		C4784T	7	G22051T	2	G25819A	1											G29027T	2
		T17139A	7	G24368T	2	C25791T	1											C29250T	2
		T21087C	7	T23842C	2	G25742T	1											G28747T	2
		C16468T	6	G22093C	2	G26109T	1											A28860T	2
		A10323G	6	C21622T	2	G25660A	1											G28936T	2
		G17122T	6	A23845T	2	C25886T	1											G28703T	2
		C20031T	6	G23873T	2	C26110T	1											G28378C	2
		C17678T	6	C23230T	2	C25521T	1											G29474T	2
		G21874T	6	G22049A	2	A26093T	1											C28512T	2
		G10901A	6	T21895C	2	G25567T	1											G29090T	2
		C15352T	5	C25276T	2	C25452T	1											G29513T	2
		T17659G	5	G21800T	2	C26111G	1											C28757T	2
		C1218T	5	A25048G	2	C25688T	1											C28657T	2
		C20235A	5	A25045T	2	G26020T	1											A28898G	2
		C6573T	5	C23551T	2	G25543T	1											G28328A	2
		C5544T	5	T23031C	2	C25797T	1											C28791T	2
		A2238G	5	T22042C	2													G29398T	2
		C18693T	5	C21691T	2													C28348T	2
		C12781T	4	C23595G	2													T28835C	2
		C12651T	4	G23587C	2													C29249T	2
		C6706T	4	T22324G	2													C28948T	2
		G5230T	4	C21622A	2													A28885G	2
		C15738T	4	G23282T	2													C28377A	1
		G13379A	4	G22346T	2													C28388G	1
		A12460G	4	A21801C	2													G29017T	1
		G11222T	4	A22206G	2													C29119G	1
		G3863A	4	G22813T	2													G29141C	1
		G12131A	4	G23012A	2													G28541T	1
		A16128G	4	C23664T	2													G2059A	1
		C9979A	4	G21986A	1													G28875T	1
		A21137G	4	T21722C	1													C29523T	1
		C1514T	3	G24095T	1													C29421T	1
		C15842T	3	C24099T	1													G28580T	1
		C11074T	3	C24553A	1													C28453T	1
		C9430T	3	A24554C	1													A28989T	1
		T19839C	3	G22592T	1													G29212C	1
		G5437T	3	G24348T	1													G29440T	1
		C6990T	3	C23679T	1													G28628T	1
		A11782G	3	A22531G	1													G28851T	1
		C2306T	3	C23380T	1													G28904A	1
		C1284T	3	G25249T	1													A28591G	1
		C2334T	3	A21620G	1													C28473T	1
		C6500T	3	T23689G	1													T28279C	1
		G3994A	3	T21823C	1													G29440C	1
		C9924T	3	G25135T	1													T29302C	1
		C12242T	3	A22503G	1													G28907T	1
		C11514T	3	C24310A	1													A28837G	1
		C4999T	3	G23282A	1													C28849T	1
		G2174A	3	T24071C	1													A28654G	1
		A2522G	3	G25352T	1													C29296T	1
		G7798T	3	C25096T	1													C28435A	1
		C18441T	3	G25157A	1													G28857T	1
		A15534G	3	C25000A	1													C29284T	1
		C11758T	3	T21765C	1													G28806T	1
		C1594T	3	T21992C	1													A29428G	1
		G16377T	3	C24378T	1													G29000T	1
		A4892G	3	A22024G	1													C28928T	1
		T16476C	3	G24193T	1													G29140A	1
		C1191T	3	C21707T	1													G28878A	1
		G9844A	3	G22104T	1													T28921A	1
		T8603C	3	C25046T	1													C29137T	1
		G20931A	3	T23010C	1
		C13515T	3	C24130T	1
		C1267T	3	A25381G	1
		A17856G	3	G25340C	1
		C14925T	3	C24138T	1
		C2232T	2	G21604T	1
		C21034T	2	C23266T	1
		C7728T	2	A2348G	1
		C10189T	2	G21793A	1
		C17288T	2	G21795T	1
		C18555T	2	T25051C	1
		T14505C	2	T24946G	1
		A16938T	2	A24952G	1
		C18060T	2	C23683T	1
		C3773T	2	C21614T	1
		C17795T	2	C22006T	1
		G7393T	2	A23526G	1
		G19542T	2	T24055C	1
		G839A	2	C21767T1	1
		A16998T	2	G24926T	1
		G14653A	2	T22207C	1
		C18526T	2	G23242C	1
		G15372T	2	A22976G	1
		C5497T	2	C21642T	1
		C20946T	2	G22203C	1
		A11991G	2	G25217T	1
		C10002T	2	G25340T	1
		T8707C	2	G24038A	1
		C6813T	2	G25049T	1
		C11344T	2	C25000T	1
		A9052G	2	T24983C	1
		C7869T	2	C24767A	1
		C18681T	2	A25176G	1
		C4755T	2	C25276T	1
		C16041T	2	C22000A	1
		C10116T	2	C22120T	1
		C683T	2	G22343C	1
		G1048T	2	G24620T	1
		A2560G	2	G25305T	1
		A1154G	2	C23248T	1
		C8152T	2	G24770T	1
		C10702T	2	C23410T	1
		A12121G	2	C25318A	1
		C2110T	2	G22708T	1
		C5284T	2	C22350T	1
		C15480A	2	G21724T	1
		C5730T	2	A25137G	1
		C6525T	2	A21999G	1
		G12070T	2	A23985G	1
		C3619T	2	T25310A	1
		C10456T	2	T25312A	1
		T16404C	2	T25333A	1
		C11208T	2	C22998T	1
		C7119T	2	C22326T	1
		T10453C	2	C24374T	1
		G17679T	2	C21721T	1
		G2246A	2	C22458T	1
		C9286T	2	G22346T	1
		C5884T	2	C22311T	1
		C17550T	2	A21647G	1
		T10792C	2	T24984G	1
		C1387T	2	C25075T	1
		G1306A	2	A21792C	1
		G18859T	2	G21795A	1
		A1731T	2	G22104C	1
		C10507T	2	T23986C	1
		G14123A	2	G24488T	1
		G3259T	2	G22205T	1
		C527T	2	C23757T	1
		C1302T	2	A25011C	1
		C4795T	2	C23673T	1
		C5646T	2	G22014T	1
		A8031G	2	G22801T	1
		C4893T	2	A22656G	1
		C21219T	2	T24505G	1
		A16171G	2	C10789T	1
		G10310A	2	G14653T	1
		C11109T	2	T22204C	1
		C8481T	2	G25012T	1
		C5512T	2	T23137C	1
		C2445T	2	G25273T	1
		C18312T	2	C21859T	1
		G11521T	2	G21718T	1
		G15438A	2	A22320G	1
		C13356T	2	C22000T	1
		C875T	2	G23401T	1
		C12073T	2	T24097C	1
		G13849A	2	T21802C	1
		C17485T	2	C21629A	1
		T20787C	2	C25339T	1
		C3876T	2	C21646T	1
		A5998G	2	G25135C	1
		C11750T	2
		C3817T	2
		C5184T	2
		T2079G	2
		G199T	2
		C1059T	2
		C5100T	2
		A9343G	2
		A12644G	1
		G14638T	1
		A6601G	1
		A5574C	1
		G10796T	1
		A13237C	1
		G15921A	1
		C18377T	1
		A15213G	1
		C2113T	1
		C8950T	1
		C10537T	1
		C16762T	1
		C5339T	1
		G5704T	1
		C18029T	1
		C3738T	1
		G7294A	1
		C10030T	1
		C6145T	1
		C6286T	1
		G19528T	1
		G19528T	1
		C21302T	1
		A3531C	1
		C7081T	1
		T8827A	1
		A15165G	1
		G2398T	1
		G19732T	1
		C2065T	1
		C9693T	1
		C14645T	1
		C18086T	1
		G18712A	1
		G11221A	1
		C2939T	1
		C3784T	1
		A9514G	1
		T3926C	1
		G18525A	1
		A9634T	1
		C18647T	1
		G1738T	1
		C17004T	1
		G16707A	1
		C8664T	1
		G6461A	1
		G17562T	1
		A16339G	1
		T5134C	1
		C18326T	1
		C20719T	1
		C19145T	1
		C3293T	1
		C2583T	1
		C17410T	1
		G17140T	1
		C10340T	1
		C6385T	1
		A21085C	1
		G21082C	1
		G19872T	1
		C17977T	1
		G11113A	1
		G7936T	1
		G21220T	1
		A15745G	1
		C13326T	1
		C3828T	1
		C1812T	1
		A17207G	1
		C11931T	1
		G8513T	1
		T7258C	1
		T20001C	1
		G12514T	1
		G19999T	1
		C18828T	1
		T13339C	1
		C12025T	1
		C3787T	1
		C673T	1
		C398T	1
		A1803G	1
		C1758T	1
		C13554T	1
		C9857T	1
		C8772T	1
		C6267T	1
		C14670T	1
		A7343G	1
		C7051T	1
		A20262G	1
		T17442C	1
		C6690T	1
		C335T	1
		G376T	1
		A21360C	1
		C18395T	1
		T16728C	1
		C13994T	1
		T13075C	1
		T9995G	1
		G9802T	1
		A3148G	1
		T19287C	1
		C7029T	1
		C16750T	1
		C6487T	1
		C17746T	1
		C4543T	1
		C7164T	1
		C21114T	1
		G5036A	1
		C1627T	1
		G669A	1
		G1719T	1
		A21474G	1
		A12075G	1
		A3190G	1
		C2910T	1
		C412T	1
		C19610T	1
		C12513T	1
		C7113T	1
		A21194G	1
		T19530C	1
		C1392T	1
		G1264T	1
		C1473T	1
		T1297C	1
		A2474G	1
		C4686T	1
		G640A	1
		A761G	1
		G8017A	1
		G1599T	1
		C4524T	1
		T2950A	1
		T13270C	1
		C19152T	1
		C6539T	1
		C9180T	1
		C13860T	1
		A9347G	1
		G839T	1
		C6636T	1
		A7089G	1
		C10448T	1
		C10733T	1
		C1190T	1
		G7743T	1
		G15894T	1
		G17278T	1
		C17465T	1
		G19111T	1
		A808G	1
		A1904G	1
		C7834T	1
		C20178T	1
		C16726T	1
		C17913T	1
		C19955T	1
		A13712G	1
		C16338T	1
		G15327T	1
		G487T	1
		C835T	1
		A12986G	1
		T17688C	1
		C5654T	1
		G6352T	1
		C12741T	1
		C15026T	1
		C17373T	1
		C20259T	1
		G7145A	1
		C8956T	1
		G17280T	1
		G19086T	1
		C539T	1
		C8991T	1
		C3177T	1
		C4276T	1
		C4582T	1
		C14649T	1
		T16456C	1
		G614A	1
		T4930C	1
		C6091T	1
		C13665T	1
		C16173T	1
		T16447C	1
		A1389C	1
		C1912T	1
		G3995A	1
		A10081T	1
		G11335T	1
		C11962T	1
		A21416G	1
		G6392C	1
		A3948G	1
		G13624T	1
		C2005T	1
		G3950T	1
		C5144T	1
		C8917T	1
		G9389A	1
		G13763T	1
		C2325T	1
		C8090T	1
		A20711T	1
		C843T	1
		T10287A	1
		A12004G	1
		A16842G	1
		G20134T	1
		C25427T	1
		G2164A	1
		A5368G	1
		G9468A	1
		G9473A	1
		C9598T	1
		A19163G	1
		G19947C	1
		C2667T	1
		G17278A	1
		C9803T	1
		A18044G	1
		C2197T	1
		G3246A	1
		C11173T	1
		G20057T	1
		C5239T	1
		C15216T	1
		C19269T	1
		C1878T	1
		A2275G	1
		A18282G	1
		C18747T	1
		C8112T	1
		C5817T	1
		A7687G	1
		A9614G	1
		C583T	1
		C664T	1
		A1291G	1
		C1420T	1
		A12544T	1
		C19318T	1
		C1454T	1
		C3092T	1
		C4456T	1
		C15540T	1
		C1426T	1
		C1926T	1
		G599A	1
		G3085T	1
		G6894T	1
		A11914G	1
		C6681T	1
		G6802T	1
		G19962T	1
		A933G	1
		A2254G	1
		G15957T	1
		C14688T	1
		A12905G	1
		C3393T	1
		T13417C	1
		C15579T	1
		C715T	1
		C7926T	1
		C9967T	1
		C4534T	1
		G7829A	1
		A14052G	1
		G12906A	1
		G370T	1
		C1102T	1
		C10556T	1
		G17667A	1
		A18066G	1
		T7117C	1
		T5602A	1
		C6285T	1
		A9025T	1
		C16443T	1
		C15824T	1
		C3695T	1
		C2983T	1
		C14670G	1
		C16877T	1
		C18483T	1
		C1938T	1
		A916G	1
		C1204T	1
		C1968T	1
		C10165T	1
		G12907T	1
		C14724T	1
		G18538T	1
		A19764T	1
		C2449T	1
		C10341T	1
		C19662T	1
		T2698C	1
		C13774T	1
		G13897T	1
		A16734C	1
		C3717T	1
		C7945T	1
		T10480C	1
		C10525T	1
		C21549T	1
		C2263T	1
		C9448T	1
		A18051C	1
		G19656T	1
		A6474G	1
		C7005A	1
		C5482T	1
		G5857A	1
		T11092C	1
		T6197A	1
		G18826A	1
		C19512T	1
		A9587G	1
		C11249T	1
		,G16647T	1
		C16887T	1
		T3271C	1
		G3892T	1
		G8462T	1
		C12809T	1
		T15939C	1
		G19388T	1
		A1808G	1
		C2523T	1
		T7767C	1
		G15937A	1
		C2416T	1
		C10626T	1
		G12067T	1
		G12067T	1
		C13421T	1
		G14874T	1
		C1616T	1
		T1708C	1
		C6730T	1
		G18880T	1
		C3885T	1
		C1457T	1
		C10519T	1
		G12071A	1
		C12312T	1
		G17427T	1
		C18698T	1
		A20142G	1
		T6996C	1
		G14028T	1
		C15699T	1
		A1622G	1
		C2841T	1
		C4068T	1
		C4832T	1
		A7758G	1
		G2447T	1
		G8179T	1
		G9584A	1
		T11621G	1
		C14790T	1
		A20059G	1
		C1346T	1
		C2704A	1
		T8373C	1
		T11629C	1
		A12130G	1
		T12340C	1
		C15952T	1
		G16377A	1
		A17482G	1
		C17483T	1
		A17484G	1
		C17485G	1
		T21387C	1
		A453G	1
		T7627C	1
		G7675T	1
		A7742G	1
		A11781G	1
		C12076T	1
		G13249T	1
		A15192T	1
		A17322G	1
		A3643C	1
		C6982T	1
		C11379T	1
		C4573T	1
		C8782T	1
		C10747T	1
		G11230T	1
		G11266T	1
		C16575T	1
		C17745T	1
		G9188T	1
		C13643T	1
		G2864A	1
		G8371T	1
		C11124T	1
		G12128A	1
		C14676A	1
		C9246T	1
		A10331G	1
		G19684T	1
		G2528A	1
		C2790T	1
		A3840T	1
		T3897C	1
		C4423T	1
		C10450T	1
		C14625T	1
		T17784C	1
		T17784C	1
		C8650T	1
		C8650T	1
		C8650T	1
		T10498A	1
		C18452T	1
		C2623T	1
		T14610C	1
		G15543C	1
		C16393T	1
		T1276A	1
		G1999C	1
		T2968C	1
		C4206T	1
		C5758T	1
		C11950T	1
		C17185T	1
		G407A	1
		G1522T	1
		G4354A	1
		G4399T	1
		T17557A	1
		G3692T	1
		C4886T	1
		C6543T	1
		T7783C	1
		T7957C	1
		T9305C	1
		T17355C	1
		C18570T	1
		G20224A	1
		C8964T	1
		G12191T	1
		C15251T	1
		C20132T	1
		T14892C	1
		T18573G	1
		C19763A	1
		C1288T	1
		G3066A	1
		C3130T	1
		C3261T	1
		G8083T	1
		T16993C	1
		C17491T	1
		A19686G	1
		C7318T	1
		T17208C	1
		A7930T	1
		C6638T	1
		G2020A	1
		C8316T	1
		C8320T	1
		G13201T	1
		C17766T	1
		C4993T	1
		C7749T	1
		G18394T	1
		T7397G	1
		C12756T	1
		G4201A	1
		C6568T	1
		C9724T	1
		C20930T	1
		A21489G	1
		C20451T	1
		A11338G	1
		T11049G	1
		C9165T	1
		G2755T	1
		G18951A	1
		,C9264T	1
		G20869T	1
		C16586G	1
		G9209A	1
		G1274T	1
		C364A	1
		T18495C	1
		G18079T	1
		G747T	1
		G1212C	1
		A1731C	1
		A3405C	1
		A3414C	1
		T3605C	1
		C3634T	1
		A8052G	1
		C11162A	1
		A13992G	1
		C15324T	1
		A16044T	1
		G18315A	1
		A11201G	1
		G3403T	1
		C11152T	1
		C14292A	1
		C7703T	1
		G558T	1
		G3564T	1
		G8137T	1
		C2455T	1
		C6762T	1
		C11788T	1
		C8619T	1
		C6031T	1
		C12003T	1
		T21376G	1
		T17643A	1
		T18447C	1
		C19374T	1
		A6601T	1
		T11713C	1
		C5544A	1
		C29249T	1
		C11020T	1
		T550C	1
		C12462T	1
		C601T	1
		T7156C	1
		G19636T	1
		T2432C	1
		C6258T	1
		A7186G	1
		C9438T	1
		C9438T	1
		A16266G	1
		G18028T	1
		G18397A	1
		C2736T	1
		C20594T	1
		C9891T	1
		T11418C	1
		T12946C	1
		G174T	1
		A2692T	1
		T6396C	1
		C17012T	1
		G5953A	1
		C8043T	1
		C16260T	1
		T20299C	1
		C21205T	1
		C6027A	1
		G9203A	1
		T9678C	1
		C11005A	1
		A17496G	1
		A20396G	1
		C1929T	1
		C10039T	1
		C19011T	1
		C8293T	1
		T11343G	1
		C12747T	1
		C13119T	1
		G15086A	1
		G18546T	1
		C19813T	1
		C2299T	1
		A21457G	1
		T21393C	1
