# Supplementary material for: Variation analysis of SARS-CoV-2 complete sequences from Iran
Source: Future Virol. 2022 Oct 22:10.2217/fvl-2021-0056. doi: 10.2217/fvl-2021-0056 (PMC9594980; doi:10.2217/fvl-2021-0056)
Supplement: Supplementary file 3 [file Supplementary_table_3.xlsx]

## Sheet: Sheet1
NSP1	Frequency	NSP2	Frequency	NSP3	Frequency	NSP4	Frequency	NSP5	Frequency	NSP6	Frequency	NSP7	Frequency	NSP8	Frequency	NSP9	Frequency	NSP10	Frequency	NSP12	Frequency	NSP13	Frequency	NSP14	Frequency	NSP15	Frequency	NSP16	Frequency	Spike (S)	Frequency	NS3	Frequency	Envelope (E)	Frequency	Membrane (M)	Frequency	NS6	Frequency	NS7a	Frequency	NS7b	Frequency	NS8	Frequency	Nucleocapsid (N)	Frequency
G98V	1	V198I	60	S126L	55	M33I	15	G283S	6	L37F	63	E50G	2	T187I	4	Q49K	18	V119I	2	P323L	214	P77L	12	A394V	14	K259R	1	G77R	7	D614G	224	Q57H	78	T9I	2	I73M	56	T21I	1	S83L	21	T40I	18	K68E	62	G204R	111
E37D	1	R27C	15	T183I	42	T492I	14	K90R	6	S106del	43	S54L	1	A14T	4	R74K	1	T111I	1	G137C	58	S485L	9	R163C	2	E202K	1	K160R	4	I210del	64	S26L	17	V14del	1	I82T	16	Y49H	1	T120I	16	E39stop	3	G66del	62	R203K	110
H45Y	1	S138L	5	I1412T	42	V167L	13	V86I	2	G107del	43	A30V	1	R51C	3	T21I	1	A32V	1	G671S	16	K460R	8	M501I	2	V127F	1	L126F	2	S477N	57	T223I	12	V62F	1	T208S	2	W27L	1	V82A	14	L11F	3	S67del	62	S194L	67
D48N	1	E478G	5	A890D	38	F17L	3	T21I	2	F108del	43	M75I	1	I185V	1	L42F	1	T101I	1	L638F	5	H290Y	7	A119S	1	P65S	1	T91M	1	D138Y	56	T223A	7	P71L	1	T175M	1			T39I	4	L14del	1	Q27stop	51	S235F	55
D33E	1	T160I	3	P1228L	17	A457V	3	P96S	1	Y80C	24	D77N	1	V34F	1	M101V	1	L133F	1	T801I	3	A296S	6	H427Y	1	K109N	1	E142Q	1	Y144del	50	W131C	6	S68F	1	G78D	1			L116F	2	F13del	1	Y73C	47	D3L	46
S166G	1	E457K	3	A488S	14	S483F	2	P96L	1	T77A	14	N78S	1	T141M	1	T19I	1			N911D	2	P78S	6	A281S	1	K12N	1	N143H	1	A570D	43	V112F	5	L73F	1	L29F	1			T14I	2	C12del	1	R52I	32	R203M	16
G112S	1	H237Y	3	P1469S	14	A446V	1	P132S	1	V84F	4			A13T	1	R74S	1			V405I	2	T481M	6	D358Y	1	A171V	1	G71C	1	S982A	43	S171L	5			H155Y	1			Q90stop	2	A15T	1	K68stop	19	D63G	15
R24C	1	P129L	3	L689F	7	F375S	1	L227F	1	T181I	3			T124I	1	R74G	1			G137S	2	F475V	5	A119V	1	V22L	1	P215L	1	T716I	42	G100C	5			H125N	1			A50D	2	A15S	1	V62L	2	D377Y	15
A117T	1	L501F	3	T942I	5	D217N	1	T93A	1	A46V	2			T124I	1	T24I	1			A400S	1	A520V	2	M169I	1	V172L	1	I267V	1	D1118H	42	V256I	3			T208I	1			D51H	2	E39Q	1	C90F	1	M234I	15
Q63R	1	T573A	3	S1285F	5	I345V	1	P168S	1	L260F	2									D153Y	1	T351I	2	S450I	1	T48K	1	D179G	1	N501Y	42	K16T	3			A2S	1			L49P	2			R52K	1	G215C	12
W161L	1	A510V	3	E382K	4	S481A	1	A191V	1	M183I	2									P112S	1	A302S	1	D375G	1	G146V	1	S240A	1	P681H	42	L95F	2			L34F	1			I3L	1			L84S	1	G34W	8
M85del	3	A476V	2	K837N	4	A307T	1	D248Y	1	A79V	2									M818I	1	L417V	1	S369F	1	S147G	1	A188S	1	H69del	41	A110V	2			S197T	1			T28I	1			W45stop	1	A220V	7
V86del	1	T85I	2	E906D	3	A22V	1	I78N	1	H11Q	1									A185V	1	T416V	1	G114C	1	T325I	1	Q18L	1	V70del	41	P240L	2							L86M	1			E92K	1	D3Y	7
S135N	1	T547I	2	P1261S	3	S218del	1			V149A	1									D284E	1	S259L	1	A225T	1	V38F	1	K253R	1	D950N	17	T151I	2							T111I	1			I58del	1	S186F	7
L92F	1	M117V	2	T725A	3	R305K	1			R93C	1									S549N	1	T410I	1	A497S	1	T112I	1	L183F	1	L699I	17	L41F	2							Q76H	1			I9T	1	P13T	6
		K81N	2	K1693N	3	E219K	1			M83I	1									M666I	1	V348L	1	P203L	1	A6S	1			I100T	17	D238Y	2							R25K	1			E106stop	1	N192K	5
		G481S	2	S1424F	3	T237I	1			L98F	1									T604I	1	C441S	1	A96V	1					P681R	17	G18V	1							A105V	1			G8V	1	A35V	2
		G12S	2	S1670F	2	F216del	1			M86I	1									T402I	1	S74P	1	T16I	1					T478K	16	V90I	1											T26I	1	D401Y	2
		T166I	2	P822L	2	A380V	1			A51V	1									S68F	1	A117G	1	T524I	1					T19R	16	D155Y	1											W45S	1	A252S	2
		V425G	2	S794L	2	S137L	1			L217V	1									G228D	1	R392C	1	V14L	1					F157del	15	P42L	1											P30L	1	N196I	2
		L24F	2	K1771R	2	D217del	1			M47I	1									G108V	1	I35V	1	V263I	1					R158del	15	S177I	1											G8E	1	P80L	2
		E309V	2	T1365I	2	T37I	1			V26G	1									M196I	1	P53S	1	E2G	1					E156G	15	R126K	1											I71V	1	A273S	2
		M405I	1	Q180H	2	V212L	1			A136V	1									V405F	1	V348M	1	A138V	1					G142D	14	D210Y	1											T11I	1	K375N	2
		P181S	1	A386V	2	A231V	1			K270R	1									T769A	1	Y324C	1	V167L	1					L452R	14	E239D	1											L4F	1	A173V	2
		F633L	1	T1269I	2	D279N	1			H64N	1									A529V	1	P419S	1	K349N	1					T95I	12	A143T	1													A414S	2
		P129S	1	R352C	2	T73I	1													D833N	1	Y253H	1	A220V	1					T22I	7	P240R	1													A211V	2
		A375V	1	S1717L	2	V344I	1													K91R	1	T214I	1	T113I	1					W104C	6	L53F	1													G25C	2
		L271F	1	S1467F	2	T204I	1													M629I	1	P172S	1	A274S	1					E1202Q	5	S165F	1													Q389H	2
		G12C	1	T976I	2	S209F	1													D62Y	1	L581F	1	V120I	1					Q675H	5	L106F	1													T16M	2
		K239N	1	T725I	2	A146V	1													S795F	1	P504S	1							A222V	5	D173G	1													D144Y	2
		V157F	1	P679L	2	T265A	1													K478N	1	Y71H	1							Q675H	5	Q17R	1													P326L	1
		T388I	1	T1004I	2	L360F	1															A598S	1							L5F	4	A51S	1													P13T	1
		E575K	1	P1921L	2	T354A	1															H164Y	1							T572I	4	N234I	1													P162S	1
		D43G	1	Q185del	1	T295I	1															A598V	1							H655Y	3	A59S	1													S188P	1
		G548C	1	M494I	1																	L176F	1							L244del	2	T176I	1													P326S	1
		M418I	1	I184del	1																									F1256L	2	P240S	1													T205I	1
		A318V	1	A1798V	1																									D215G	2	P262S	1													L219F	1
		K333R	1	T186del	1																									D574Y	2	T12I	1													A208del	1
		K557E	1	T182del	1																									L242del	2	F105L	1													R209del	1
		S196L	1	T183del	1																									D80A	2	G224C	1													A211del	1
		K335E	1	Y952S	1																									A243del	2	G254V	1													M210del	1
		S358L	1	P278del	1																									M177I	2	S58G	1													P207del	1
		I515V	1	T1866I	1																									T678S	2	A99V	1													A119S	1
		T573I	1	T1677I	1																									D936Y	2	A33S	1													G178V	1
		N195T	1	G277del	1																									E180K	2	S117I	1													E378Q	1
		H194Y	1	V1885A	1																									Q677H	2															S193I	1
		P13L	1	L279del	1																									K1191N	2															A35E	1
		I273V	1	N276del	1																									A771S	2															K248N	1
		A507V	1	T942K	1																									F490S	2															K248N	1
		T223I	1	A1775V	1																									I850L	2															Q39E	1
		I367V	1	P874S	1																									A263V	1															A211V	1
		L217F	1	T1348I	1																									Q23K	1															P13T	1
		I42del	1	P1662S	1																									N1023B	1															A308S	1
		A336V	1	P1103Q	1																									P479L	1															R209I	1
		S378F	1	T1275I	1																									K77T	1															N192K	1
		A621V	1	L1226P	1																									L1141W	1															P13L	1
		R218C	1	A602V	1																									K417N	1															A90S	1
		T374I	1	G282V	1																									E484K	1															R209G	1
		G265V	1	V325F	1																									A701V	1															E290Q	1
		C136S	1	S1675I	1																									H69Y	1															S202N	1
		E309A	1	P723S	1																									V1122L	1															G243C	1
		A593V	1	A1915S	1																									T859I	1															G212C	1
		S305I	1	E391D	1																									H655R	1															T417I	1
		S543P	1	A496V	1																									E1150D	1															R195I	1
				T24I	1																									D1199N	1															Q239L	1
				E374V	1																									V976F	1															D216E	1
				V393A	1																									C1250R	1															R209I	1
				T1306I	1																									D1257E	1															A211T	1
				M560I	1																									S255F	1															L221F	1
				N1457S	1																									L938F	1															A35V	1
				C1392F	1																									K417N	1															P13T	1
				P340L	1																									E484K	1															G19R	1
				E1294D	1																									A701V	1															D103Y	1
				D271A	1																									V826M	1															T24I	1
				P74S	1																									I472V	1															T296I	1
				V1248M	1																									H49Y	1															T326I	1
				P192S	1																									A1070S	1															P383L	1
				T1429N	1																									G181V	1															S201I	1
				E1252G	1																									L54F	1
				S1437F	1																									D138H	1
				E122D	1																									K558N	1
				A1324V	1																									S151I	1
				L1361F	1																									T732I	1
				D411Y	1																									S704L	1
				T1465I	1																									E1150A	1
				A333V	1																									A706V	1
				V1704I	1																									T20A	1
				Q1884H	1																									Q675R	1
				E49K	1																									D1163Y	1
				S1542G	1																									T998P	1
				T656I	1																									M1237I	1
				A1183V	1																									Q52H	1
				S1160T	1																									D253G	1
				P153L	1																									V1264L	1
				I1426T	1																									Y837H	1
				M1788I	1																									Q613H	1
				G116D	1																									R78M	1
				S1675G	1																									D1260H	1
				T181I	1																									I68T	1
				E308D	1																									K1205R	1
				N1680S	1																									D80Y	1
				S370L	1																									D215Y	1
				A41V	1																									C1248F	1
				A450V	1																									T859N	1
				L1791F	1																									A1020S	1
				A1736V	1																									G261K	1
				E426K	1																									H146Q	1
				P125S	1																									Q14H	1
				G1476S	1																									A27V	1
				I1683T	1																									G1219C	1
				K1211N	1																									R214P	1
				A1321V	1																									Y144H	1
				T1482I	1																									Q675R	1
				K1737N	1																									N709K	1
				T1189I	1																									V143D	1
				D1225H	1																									L18F	1
				V1932F	1																									A163T	1
				H1274Y	1																									R78K	1
				F961L	1																									G181A	1
				A225V	1																									A163T	1
				S1560A	1																									Y365C	1
				H1307Y	1																									P1162S	1
				S176N	1																									T859N	1
				C296R	1																									Q675R	1
				E229A	1																									I1130M	1
				T1180I	1																									D1260Y	1
				K232T	1																									P1069T	1
				R1341L	1																									D80Y	1
				D410G	1																									D1145E	1
				P389L	1																									V483A	1
				N1778S	1																									S939F	1
				S403P	1																									T250I	1
				Q995H	1																									T299I	1
				T64I	1																									T29A	1
				A1033V	1																									A262S	1
				G773R	1																									N1192S	1
				T6I	1																									D808G	1
				I1489M	1																									H146R	1
																														A344S	1
																														M1229I	1
																														S929I	1
																														Q314R	1
																														D574N	1
																														G142S	1
																														A846V	1
																														A845S	1
