# Supplementary material for: Variation analysis of SARS-CoV-2 complete sequences from Iran
Source: Future Virol. 2022 Oct 22:10.2217/fvl-2021-0056. doi: 10.2217/fvl-2021-0056 (PMC9594980; doi:10.2217/fvl-2021-0056)
Supplement: Supplementary file 4 [file Supplementary_table_4.xlsx]

## Sheet: metadata_280_sequences
Virus name	Accession ID	AA Substitutions
hCoV-19/Iran/Qom-629/2020	EPI_ISL_1014676	NSP2_A476V	NSP16_L126F	N_S194L	NS3_Q57H	Spike_I210del	NSP12_A400S	NSP12_P323L	Spike_D614G	NSP8_I185V)
hCoV-19/Iran/Qom-907/2020	EPI_ISL_1014677	NSP2_V198I	NSP2_R27C	NSP4_M33I	NSP6_L37F)
hCoV-19/Iran/Ghilan-S1-32/2020	EPI_ISL_1014678	NSP2_V198I	NSP2_A476V	NSP5_P96S	NSP3_T942I	NSP13_A302S	NS3_V112F	NSP3_L689F	N_P326L	Spike_D614G	NSP6_L37F	N_A220V	NS3_T223A)
hCoV-19/Iran/Ghilan-S15-319/2020	EPI_ISL_1014679	NSP13_H290Y	NSP12_P323L	Spike_D614G)
hCoV-19/Iran/Ghilan-T15-191/2020	EPI_ISL_1014680	NSP13_H290Y	NSP12_P323L	Spike_D614G)
hCoV-19/Iran/Ghilan-M30-241/2020	EPI_ISL_1014681	N_S194L	N_P13T	NS3_Q57H	Spike_I210del	NSP12_L638F	NSP12_P323L	Spike_D614G	NS3_G18V)
hCoV-19/Iran/Hamedan-66H/2020	EPI_ISL_1014682	NSP2_V198I	NSP8_T187I	NS7b_T40I	NSP3_S1670F	N_A35V	NSP6_L37F)
hCoV-19/Iran/Urmia-715U/2020	EPI_ISL_1014683	NSP2_V198I	NSP8_T187I	NS7b_T40I	NSP3_S1670F	N_A35V	NSP6_L37F)
hCoV-19/Iran/Urmia-931U/2020	EPI_ISL_1014684	Spike_I210del)
hCoV-19/Iran/Kashmar-15K/2020	EPI_ISL_1014685	NSP2_T160I	NSP3_Q185del	N_S194L	NSP3_M494I	NSP3_I184del	NS3_Q57H	Spike_I210del	NS3_T223I	N_G34W	NSP16_T91M	NSP12_P323L	Spike_D614G	NSP3_T186del	NSP3_T182del	NSP3_T183del)
hCoV-19/Iran/Tehran-05V/2020	EPI_ISL_1014686	NSP3_E382K	NSP3_S126L	NSP3_A1798V	N_P162S	Spike_S477N	NS8_K68E	N_R203K	NS8_G66del	NSP12_G137C	N_G204R	Spike_D138Y	NS8_S67del	NSP12_P323L	Spike_D614G	M_I73M)
hCoV-19/Iran/Tehran-055M/2020	EPI_ISL_1014687	N_S194L	NS3_Q57H	Spike_I210del	Spike_L5F	NSP6_Y80C	NSP3_Y952S	NSP12_P323L	Spike_D614G	Spike_F1256L)
hCoV-19/Iran/AK-SARS-27/2020	EPI_ISL_1398364	NSP2_V198I	NSP3_T942I	NS3_V112F	NSP16_E142Q	NSP3_L689F	Spike_D614G	NSP6_L37F	N_A220V	NS3_T223A	NSP16_N143H)
hCoV-19/Iran/AK-SARS-48/2020	EPI_ISL_1398925	NSP2_V198I	Spike_H655Y	N_S188P	NSP2_M405I	NSP3_T1866I	NSP6_L37F	NSP3_E906D)
hCoV-19/Iran/AK-SARS-A7/2020	EPI_ISL_1398937	E_V14del	NSP2_V198I	NSP3_P278del	NSP3_T1677I	N_S188P	NSP14_A119S	NSP3_G277del	E_T9I	NS6_Y49H	NSP13_A520V	NSP3_L279del	NSP3_N276del	NSP6_L37F	Spike_A263V)
hCoV-19/Iran/Hormozgan/2020	EPI_ISL_1533610	NSP2_P181S	NSP2_V198I	Spike_Q23K	NSP3_V1885A	Spike_N1023B	NSP13_L417V	NSP2_F633L	NSP13_T416V	NSP6_L37F)
hCoV-19/Iran/Tehran-NIC-K23/2021	EPI_ISL_1993547	Spike_H69del	NS8_Q27stop	NSP3_T183I	Spike_T716I	NSP6_S106del	N_R203K	Spike_A570D	NS3_W131C	NSP5_G283S	Spike_N501Y	NSP3_I1412T	Spike_P681H	Spike_Y144del	NSP6_G107del	NSP3_A890D	Spike_D1118H	NSP6_F108del	NS8_Y73C	N_G204R	Spike_V70del	NSP12_P323L	Spike_D614G	N_D3L	Spike_S982A	N_S235F)
hCoV-19/Iran/Hormozghan-NIC-15/2021	EPI_ISL_1993548	Spike_H69del	NS8_Q27stop	NSP3_T183I	Spike_T716I	NSP6_S106del	N_R203K	Spike_A570D	NS3_W131C	NSP5_G283S	Spike_N501Y	NSP3_I1412T	NS8_R52I	Spike_P681H	Spike_Y144del	NSP6_G107del	NSP3_A890D	Spike_D1118H	NSP6_F108del	NS8_Y73C	N_G204R	Spike_V70del	NSP12_P323L	Spike_D614G	N_D3L	Spike_S982A	N_S235F)
hCoV-19/Iran/Tehran-NIC-24/2021	EPI_ISL_1993549	Spike_H69del	NSP2_E457K	NSP3_T183I	Spike_T716I	NS8_K68stop	N_R203K	Spike_A570D	Spike_N501Y	Spike_L699I	NSP3_I1412T	NS7a_S83L	Spike_P681H	Spike_Y144del	NSP3_A890D	Spike_D1118H	NS8_Y73C	N_G204R	Spike_V70del	Spike_I100T	NSP12_P323L	Spike_D614G	N_D3L	Spike_S982A	N_S235F)
hCoV-19/Iran/Tehran-NIC-V30/2021	EPI_ISL_1993550	Spike_H69del	NS8_Q27stop	NSP3_T183I	Spike_T716I	NSP6_S106del	N_R203K	Spike_A570D	NSP5_G283S	Spike_N501Y	NSP3_I1412T	NS8_R52I	Spike_P681H	Spike_Y144del	NSP6_G107del	NSP3_A890D	Spike_D1118H	NSP6_F108del	NS8_Y73C	N_G204R	Spike_V70del	NSP12_P323L	Spike_D614G	N_D3L	Spike_S982A	N_S235F)
hCoV-19/Iran/Tehran-NIC-SH17/2021	EPI_ISL_1993551	Spike_H69del	NS8_Q27stop	NSP3_T183I	Spike_T716I	NSP6_S106del	N_R203K	Spike_A570D	NS3_W131C	NSP5_G283S	Spike_N501Y	NSP3_I1412T	NS8_R52I	Spike_P681H	Spike_Y144del	NSP6_G107del	NSP3_A890D	Spike_D1118H	NSP6_F108del	NS8_Y73C	N_G204R	Spike_V70del	NSP12_P323L	Spike_D614G	N_D3L	Spike_S982A	N_S235F)
hCoV-19/Iran/Tehran-NIC-30/2021	EPI_ISL_1993552	Spike_H69del	NS8_Q27stop	NSP3_T183I	Spike_T716I	NSP6_S106del	N_R203K	Spike_A570D	NS3_W131C	NSP5_G283S	Spike_N501Y	Spike_L699I	NSP3_I1412T	NS8_R52I	Spike_P681H	Spike_Y144del	NSP6_G107del	NSP3_A890D	Spike_D1118H	NSP6_F108del	NS8_Y73C	N_G204R	Spike_V70del	NSP12_P323L	Spike_D614G	N_D3L	Spike_S982A	N_S235F)
hCoV-19/Iran/Tehran-NIC-23K/2021	EPI_ISL_1993553	Spike_H69del	NS8_Q27stop	NSP3_T183I	Spike_T716I	NSP6_S106del	N_R203K	Spike_A570D	NS3_W131C	NSP5_G283S	Spike_N501Y	NSP3_I1412T	NS8_R52I	Spike_P681H	Spike_Y144del	NSP6_G107del	NSP3_A890D	Spike_D1118H	NSP6_F108del	NS8_Y73C	N_G204R	Spike_V70del	NSP12_P323L	Spike_D614G	N_D3L	Spike_S982A	N_S235F)
hCoV-19/Iran/Tehran-NIC-28/2021	EPI_ISL_1993554	Spike_H69del	NS8_Q27stop	NSP3_T183I	Spike_T716I	NS8_K68stop	NSP6_S106del	NSP13_S259L	N_R203K	Spike_A570D	Spike_N501Y	Spike_L699I	NSP3_I1412T	NS7a_S83L	NS8_R52I	Spike_P681H	Spike_Y144del	NSP6_G107del	Spike_D1118H	NSP6_F108del	NS8_Y73C	N_G204R	Spike_V70del	Spike_I100T	NSP12_P323L	Spike_D614G	N_D3L	Spike_S982A	NS3_S171L	N_S235F)
hCoV-19/Iran/Tehran-NIC-31/2021	EPI_ISL_1993555	Spike_H69del	NS8_Q27stop	NSP3_T183I	NS7a_T39I	Spike_T716I	NSP6_S106del	N_R203K	Spike_A570D	NSP3_T942K	Spike_N501Y	NSP3_I1412T	NS8_R52I	Spike_P681H	Spike_Y144del	NS3_G100C	NSP6_G107del	NSP3_A890D	Spike_D1118H	NSP6_F108del	NS8_Y73C	N_G204R	NS8_C90F	Spike_V70del	NSP12_P323L	Spike_D614G	N_D3L	Spike_S982A	N_S235F)
hCoV-19/Iran/Tehran-NIC-17/2021	EPI_ISL_1993556	Spike_H69del	NS8_Q27stop	NSP2_E457K	NSP3_T183I	Spike_T716I	NS8_K68stop	NSP6_S106del	N_R203K	NSP6_A46V	Spike_A570D	Spike_N501Y	Spike_L699I	NSP3_I1412T	NS7a_S83L	NS8_R52I	Spike_P681H	Spike_Y144del	NSP6_G107del	NSP3_A890D	Spike_D1118H	NSP6_F108del	NS8_Y73C	N_G204R	Spike_V70del	Spike_I100T	NSP12_P323L	Spike_D614G	N_D3L	Spike_S982A	N_S235F)
hCoV-19/Iran/Tehran-NIC-15/2021	EPI_ISL_1993557	Spike_H69del	NS8_Q27stop	NSP3_T183I	Spike_T716I	NS8_K68stop	NSP6_S106del	N_R203K	Spike_A570D	NSP3_A1775V	Spike_N501Y	Spike_L699I	NSP3_I1412T	NS7a_S83L	NS8_R52I	Spike_P681H	Spike_Y144del	NSP6_G107del	NSP3_A890D	Spike_D1118H	NSP6_F108del	NS8_Y73C	N_G204R	Spike_V70del	Spike_I100T	NSP12_P323L	Spike_D614G	N_D3L	Spike_S982A	N_S235F)
hCoV-19/Iran/GRC-S1221/2021	EPI_ISL_2227204	N_G215C	Spike_T95I	N_D63G	N_R203M	NSP12_G671S	Spike_G142D	Spike_E1202Q	NS3_S26L	Spike_P681R	Spike_R158del	NSP3_P1228L	NS7a_V82A	NSP3_A488S	Spike_F157del	NSP4_T492I	NSP14_A394V	Spike_T19R	NS7a_T120I	N_D377Y	M_I82T	Spike_D950N	NS7b_T40I	Spike_E156G	NSP3_P1469S	Spike_T478K	NSP6_T77A	NSP12_P323L	Spike_D614G	Spike_L452R	NSP4_V167L)
hCoV-19/Iran/GRC-S1215/2021	EPI_ISL_2227268	N_G215C	Spike_T95I	N_D63G	N_R203M	NSP3_P1662S	Spike_P479L	NSP12_G671S	Spike_G142D	NS3_S26L	Spike_P681R	Spike_R158del	NSP3_P1228L	N_P326S	NS7a_V82A	NSP3_A488S	Spike_F157del	NSP4_T492I	NSP14_A394V	Spike_T19R	NS7a_T120I	M_I82T	Spike_D950N	NS7b_T40I	NSP13_P77L	Spike_E156G	NSP3_P1469S	Spike_T478K	NSP6_T77A	NSP12_P323L	Spike_D614G	NSP4_V167L	Spike_L452R)
hCoV-19/Iran/GRC-S1218/2021	EPI_ISL_2227269	N_G215C	Spike_T95I	N_D63G	N_R203M	NSP12_G671S	Spike_E1202Q	NS3_S26L	Spike_P681R	Spike_R158del	NSP3_P1228L	Spike_Y144del	NS7a_V82A	NSP3_A488S	Spike_F157del	NSP4_T492I	NSP14_A394V	Spike_T19R	NS7a_T120I	M_I82T	Spike_D950N	NS7b_T40I	NSP13_P77L	Spike_E156G	NSP3_P1469S	Spike_T478K	NSP6_T77A	NSP12_P323L	Spike_D614G	NSP4_V167L	Spike_L452R)
hCoV-19/Iran/GRC-S1217/2021	EPI_ISL_2227270	N_G215C	Spike_T95I	N_D63G	N_R203M	NSP12_G671S	Spike_G142D	Spike_E1202Q	NS3_S26L	Spike_P681R	Spike_R158del	NSP3_P1228L	NS7a_V82A	NSP3_A488S	Spike_F157del	NSP4_T492I	NSP14_A394V	Spike_T19R	NS7a_T120I	N_D377Y	M_I82T	Spike_D950N	NS7b_T40I	Spike_E156G	NSP3_P1469S	Spike_T478K	NSP6_T77A	NSP12_P323L	Spike_D614G	Spike_L452R	NSP4_V167L)
hCoV-19/Iran/GRC-S1216/2021	EPI_ISL_2227271	NS7a_L116F	N_D63G	N_R203M	NSP12_G671S	Spike_G142D	NSP2_P129L	Spike_D574Y	NS3_S26L	E_V62F	Spike_P681R	Spike_R158del	NS7a_V82A	Spike_F157del	Spike_T19R	NS7a_T120I	N_D377Y	M_I82T	NSP6_V149A	Spike_D950N	Spike_L1141W	NSP3_P822L	Spike_E156G	NSP4_A446V	Spike_T478K	NSP12_P323L	Spike_D614G	Spike_L452R)
hCoV-19/Iran/GRC-S1213/2021	EPI_ISL_2227272	NSP4_D217N	N_D63G	N_R203M	Spike_G142D	NSP2_P129L	NSP3_P1103Q	Spike_K77T	NS3_S26L	NSP4_F375S	Spike_P681R	Spike_R158del	NS7a_V82A	Spike_F157del	Spike_T19R	NS7a_T120I	N_D377Y	M_I82T	Spike_D950N	NSP3_P822L	Spike_E156G	NSP15_K259R	Spike_T478K	NSP6_H11Q	NSP12_P323L	Spike_D614G	Spike_L452R	NSP6_L37F)
hCoV-19/Iran/GRC-S013/2021	EPI_ISL_2227273	NS7b_E39stop	NSP3_S794L	Spike_D215G	E_P71L	NSP3_K837N	Spike_K417N	Spike_L244del	NSP6_G107del	NSP6_S106del	Spike_E484K	N_T205I	NSP6_F108del	Spike_L242del	NS3_Q57H	Spike_A701V	NSP2_T85I	Spike_D80A	Spike_N501Y	NSP5_K90R	Spike_D614G	Spike_A243del	NS3_S171L)
hCoV-19/Iran/GRC-Q0275/2021	EPI_ISL_2227280	Spike_S477N	NS3_V90I	NS8_K68E	N_R203K	Spike_H69Y	NS8_G66del	NSP12_G137C	N_G204R	NSP12_P112S	Spike_D138Y	NS8_S67del	NSP12_P323L	NSP12_D153Y	Spike_D614G	M_I73M	Spike_V1122L)
hCoV-19/Iran/GRC-Q0283/2021	EPI_ISL_2227281	NSP3_S126L	Spike_S477N	NS8_K68E	Spike_T859I	N_R203K	NS8_G66del	NSP12_G137C	N_G204R	Spike_D138Y	NS8_S67del	NSP12_P323L	Spike_D614G	M_I73M	NSP14_H427Y)
hCoV-19/Iran/GRC-P2623/2021	EPI_ISL_2227282	NS7b_F13del	NS7b_C12del	N_S194L	NS3_Q57H	Spike_I210del	NSP6_Y80C	NSP12_P323L	Spike_D614G	NS7b_L14del)
hCoV-19/Iran/GRC-Zah-11-122/2021	EPI_ISL_2253220	NSP3_S126L	Spike_W104C	Spike_S477N	NS8_K68E	NSP5_P96L	N_R203K	NS8_G66del	NSP12_G137C	Spike_M177I	N_G204R	Spike_H655R	Spike_D138Y	NS8_S67del	NSP12_P323L	Spike_D614G	M_I73M	N_S235F)
hCoV-19/Iran/GRC-Sh-11-109/2021	EPI_ISL_2254131	NSP2_L501F	Spike_I210del	NSP12_P323L	Spike_D614G	N_S235F)
hCoV-19/Iran/GRC-Zah-11-124/2021	EPI_ISL_2254498	NSP3_T1275I	NSP15_E202K	NS8_K68E	NSP3_K1771R	N_R203K	NS8_G66del	NS3_Q57H	NSP10_T111I	Spike_I210del	N_G204R	Spike_E1150D	NSP3_V325F	NS8_S67del	NSP12_P323L	NSP5_K90R	Spike_D614G	Spike_Y144del	N_D3L	NSP3_P723S	N_S235F)
hCoV-19/Iran/GRC-Sh-11-110/2021	EPI_ISL_2254718	Spike_H69del	NS8_Q27stop	NSP3_T183I	NS7a_T39I	Spike_T716I	NSP6_S106del	N_R203K	Spike_A570D	Spike_I210del	Spike_N501Y	NS8_S67del	NSP3_I1412T	Spike_P681H	Spike_Y144del	NSP6_G107del	NS8_K68E	Spike_D1118H	NSP6_F108del	NS8_G66del	NS8_Y73C	N_G204R	Spike_V70del	NSP12_P323L	Spike_D614G	N_D3L	Spike_S982A	N_S235F)
hCoV-19/Iran/GRC-Sh-11-114/2021	EPI_ISL_2254719	NSP12_M818I	NSP14_D358Y	NS3_Q57H	Spike_I210del	NSP3_S1675I	NSP13_V348L	NSP2_P129S	NSP13_T410I	NSP12_P323L	Spike_D614G	Spike_D1199N)
hCoV-19/Iran/GRC-Zah-11-125/2021	EPI_ISL_2254723	NSP3_S126L	NS8_Q27stop	NSP3_P1261S	NS8_K68E	N_R203K	Spike_A570D	NS8_G66del	NS3_Q57H	NS8_Y73C	Spike_I210del	N_G204R	NS8_S67del	NSP12_P323L	NSP8_R51C	Spike_D614G	Spike_Y144del	N_D3L	Spike_S982A	Spike_A222V	N_S235F)
hCoV-19/Iran/GRC-Esf-11-171/2021	EPI_ISL_2350364	NSP15_V127F	NSP3_T1365I	N_S194L	NSP1_H45Y	NS3_Q57H	Spike_I210del	NSP6_Y80C	NSP12_P323L	Spike_D614G	NS3_S171L)
hCoV-19/Iran/GRC-Esf-11-173/2021	EPI_ISL_2352026	NSP4_S481A	NSP14_A119V	N_S194L	NS3_Q57H	NSP12_A185V	Spike_I210del	NSP1_E37D	NSP12_P323L	Spike_D614G)
hCoV-19/Iran/Kerman-NIC-K1/2021	EPI_ISL_2360250	Spike_H69del	NS8_Q27stop	NSP3_T183I	Spike_T716I	NS8_K68stop	NSP6_S106del	N_R203K	Spike_A570D	N_L219F	NSP3_L1226P	Spike_N501Y	Spike_V976F	E_S68F	NSP3_I1412T	NS8_R52I	Spike_P681H	Spike_Y144del	NSP6_G107del	NSP3_A890D	Spike_D1118H	NSP6_F108del	NS8_Y73C	N_G204R	Spike_V70del	NSP12_P323L	Spike_D614G	N_D3L	Spike_S982A	N_S235F)
hCoV-19/Iran/Kerman-NIC-K2/2021	EPI_ISL_2360251	Spike_H69del	NS8_Q27stop	NSP3_T183I	Spike_T716I	NS8_K68stop	NSP6_S106del	N_R203K	Spike_A570D	Spike_N501Y	NS8_V62L	Spike_L699I	NSP3_I1412T	NS6_W27L	NS7a_S83L	NS8_R52I	Spike_P681H	Spike_Y144del	NSP2_A375V	NSP6_G107del	NSP3_A890D	Spike_D1118H	NSP6_F108del	NS8_Y73C	N_G204R	Spike_V70del	Spike_I100T	NSP12_P323L	Spike_D614G	N_D3L	Spike_S982A	N_S235F)
hCoV-19/Iran/Yazd-NIC-Y3/2021	EPI_ISL_2360252	N_G215C	Spike_T95I	N_D63G	N_R203M	NSP12_G671S	Spike_G142D	Spike_E1202Q	NS3_S26L	Spike_P681R	Spike_R158del	NSP3_P1228L	Spike_F1256L	NS7a_V82A	NSP3_A488S	Spike_F157del	NSP4_T492I	NSP14_A394V	Spike_T19R	NS7a_T120I	N_D377Y	M_I82T	Spike_D950N	NS7b_T40I	NSP13_P77L	Spike_E156G	Spike_C1250R	Spike_D1257E	NSP1_G98V	NSP3_P1469S	Spike_T478K	NSP3_G282V	NSP6_L260F	NSP6_T77A	NSP12_P323L	Spike_D614G	NSP4_V167L	Spike_L452R)
hCoV-19/Iran/Maku-NIC-M5/2021	EPI_ISL_2360253	N_G215C	Spike_T95I	N_D63G	N_R203M	NSP12_G671S	Spike_G142D	NSP12_D284E	NS3_S26L	Spike_P681R	Spike_R158del	NSP3_P1228L	NS7a_V82A	NSP3_A488S	Spike_F157del	NSP4_T492I	NSP14_A394V	Spike_T19R	NS7a_T120I	N_D377Y	M_I82T	Spike_D950N	NS7b_T40I	NSP13_P77L	Spike_E156G	NSP3_P1469S	Spike_T478K	NSP6_T77A	NSP12_P323L	Spike_D614G	NSP4_V167L	Spike_L452R	Spike_S255F)
hCoV-19/Iran/Yazd-NIC-Y6/2021	EPI_ISL_2360254	N_G215C	Spike_T95I	N_D63G	N_R203M	NSP12_G671S	Spike_G142D	Spike_E1202Q	NS3_S26L	Spike_P681R	Spike_R158del	NSP3_P1228L	NS7a_V82A	NSP3_A488S	Spike_F157del	NSP4_T492I	NSP14_A394V	Spike_T19R	NS7a_T120I	N_D377Y	M_I82T	Spike_D950N	NS7b_T40I	NSP13_P77L	Spike_L938F	Spike_E156G	NSP3_P1469S	Spike_T478K	NSP6_T77A	NSP12_P323L	Spike_D614G	NSP4_V167L	Spike_L452R)
hCoV-19/Iran/Hormozghan-NIC-B7/2021	EPI_ISL_2360255	NS7b_E39stop	E_P71L	NSP3_K837N	Spike_K417N	NSP6_S106del	Spike_E484K	Spike_A701V	Spike_N501Y	Spike_A243del	Spike_D215G	NSP3_S794L	N_T362I	Spike_L244del	NSP6_G107del	N_T205I	NSP6_F108del	Spike_L242del	NS3_Q57H	NSP2_T85I	Spike_D80A	NSP5_K90R	Spike_D614G	NS3_S171L)
hCoV-19/Iran/Boshehr-NIC-P10/2021	EPI_ISL_2360256	N_G215C	N_D63G	N_R203M	NSP12_G671S	NSP5_V86I	Spike_G142D	NS3_S26L	Spike_P681R	Spike_R158del	NSP3_P1228L	NS7a_V82A	NSP3_A488S	Spike_F157del	NSP4_T492I	NSP14_A394V	Spike_T19R	NS3_D238Y	NS7a_T120I	NSP2_K81N	N_D377Y	M_I82T	Spike_D950N	NS7b_T40I	NSP13_P77L	Spike_E156G	NSP3_P1469S	Spike_T478K	NSP6_T77A	NSP3_S1285F	NSP12_P323L	Spike_D614G	NSP4_V167L	Spike_L452R)
hCoV-19/Iran/Boshehr-NIC-P11/2021	EPI_ISL_2360257	N_G215C	N_D63G	N_R203M	NSP12_G671S	NSP5_V86I	Spike_G142D	NS3_S26L	Spike_P681R	Spike_R158del	NSP3_P1228L	NS7a_V82A	NSP3_A488S	Spike_F157del	NSP4_T492I	NSP14_A394V	Spike_T19R	NS3_D238Y	NS7a_T120I	NSP2_K81N	N_D377Y	M_I82T	Spike_D950N	NS7b_T40I	NSP13_P77L	Spike_E156G	NSP3_P1469S	Spike_T478K	NSP6_T77A	NSP3_S1285F	NSP12_P323L	Spike_D614G	NSP4_V167L	Spike_L452R)
hCoV-19/Iran/GRC-Esf-11-174/2021	EPI_ISL_2364567	NSP3_K837N	N_S194L	NS3_Q57H	Spike_I210del	NSP6_Y80C	NSP12_P323L	NS7b_A15T	Spike_D614G	NSP3_A602V)
hCoV-19/Iran/GRC-T11747/2021	EPI_ISL_2365352	NSP2_L271F	N_S194L	NS3_Q57H	Spike_I210del	Spike_V826M	NSP12_P323L	Spike_D614G	NSP16_K160R	NSP14_A281S)
hCoV-19/Iran/GRC-T11762/2021	EPI_ISL_2365353	NSP2_M117V	NSP3_P1261S	N_M234I	NS3_L95F	NS3_Q57H	N_D401Y	NSP12_P323L	Spike_D614G	Spike_Q675H)
hCoV-19/Iran/GRC-T11763/2021	EPI_ISL_2365354	NSP2_M117V	NSP3_P1261S	N_M234I	NS3_L95F	NS3_Q57H	N_D401Y	NSP12_P323L	Spike_D614G	Spike_Q675H)
hCoV-19/Iran/GRC-T11779/2021	EPI_ISL_2365355	Spike_H69del	NS8_Q27stop	NSP3_T183I	Spike_T716I	NS8_K68stop	NSP6_S106del	N_R203K	Spike_A570D	Spike_N501Y	Spike_L699I	NSP3_I1412T	NS7a_S83L	NS8_R52I	Spike_P681H	Spike_Y144del	M_T208S	NSP6_G107del	NSP3_A890D	Spike_D1118H	NSP6_F108del	NS8_Y73C	N_G204R	Spike_V70del	Spike_I100T	NSP12_P323L	Spike_D614G	N_D3L	Spike_S982A	N_S235F)
hCoV-19/Iran/GRC-T11800/2021	EPI_ISL_2365835	Spike_H69del	NS8_Q27stop	NSP3_T183I	Spike_T716I	NS8_K68stop	NSP6_S106del	N_R203K	Spike_A570D	Spike_N501Y	Spike_L699I	NSP3_I1412T	NS7a_S83L	NS8_R52I	Spike_P681H	Spike_Y144del	M_T208S	NSP6_G107del	NSP3_A890D	Spike_D1118H	NSP6_F108del	NS8_Y73C	N_G204R	Spike_V70del	Spike_I100T	NSP12_P323L	Spike_D614G	N_D3L	Spike_S982A	N_S235F)
hCoV-19/Iran/T11881/2021	EPI_ISL_2365857	Spike_H69del	NS8_Q27stop	NSP3_T183I	Spike_T716I	N_R203K	Spike_A570D	NS3_S26L	Spike_N501Y	NSP3_I1412T	NS8_R52I	Spike_P681H	Spike_Y144del	NS3_G100C	NSP3_A890D	Spike_D1118H	NS8_Y73C	N_G204R	Spike_V70del	NSP12_P323L	Spike_D614G	N_D3L	Spike_S982A	N_S235F)
hCoV-19/Iran/GRC-T11479/2021	EPI_ISL_2447897	NS7b_E39stop	NSP13_S485L	NS8_Q27stop	N_M234I	NSP3_E391D	NS3_Q57H	N_D3Y	Spike_I472V	NSP13_A296S	NS3_T223I	NSP2_E478G	NSP12_P323L	NSP14_S450I	NSP3_A1915S	Spike_D614G	NSP2_S138L	NSP9_L42F)
hCoV-19/Iran/GRC-T11480/2021	EPI_ISL_2447986	Spike_H69del	NS8_Q27stop	NSP15_P65S	NSP3_T183I	Spike_T716I	NSP6_S106del	NSP10_A32V	N_R203K	Spike_A570D	NSP12_S549N	Spike_I210del	NSP13_A296S	Spike_N501Y	NSP3_I1412T	NS7a_S83L	Spike_P681H	NS8_R52K	Spike_Y144del	NSP14_M169I	NSP6_G107del	Spike_D1118H	NSP6_F108del	NS8_Y73C	N_G204R	Spike_V70del	NSP9_T21I	NSP12_P323L	Spike_D614G	N_D3L	Spike_S982A	N_S235F)
hCoV-19/Iran/GRC-T11488/2021	EPI_ISL_2447987	NSP13_S485L	NS8_Q27stop	N_M234I	NSP3_T725A	N_R203K	NS3_Q57H	N_D3Y	N_G204R	NSP12_N911D	NSP13_A296S	NS3_T223I	NS7a_S83L	NSP2_E478G	NSP12_P323L	Spike_D614G	NSP2_S138L	Spike_Y144del)
hCoV-19/Iran/GRC-Q-11-102/2021	EPI_ISL_2455499	Spike_H69del	NS8_Q27stop	NSP3_T183I	Spike_T716I	NS8_K68stop	NSP6_S106del	N_R203K	Spike_A570D	NSP13_K460R	NSP13_P78S	Spike_N501Y	NSP3_I1412T	Spike_P681H	Spike_Y144del	NSP6_G107del	NSP3_A890D	Spike_D1118H	NSP6_F108del	NS8_Y73C	N_G204R	Spike_V70del	NSP12_P323L	Spike_D614G	N_D3L	Spike_S982A	N_S235F)
hCoV-19/Iran/GRC-Q-11-103/2021	EPI_ISL_2455501	Spike_H69del	NS8_Q27stop	NSP3_T183I	Spike_T716I	NSP6_S106del	N_R203K	Spike_A570D	NSP13_K460R	NSP13_P78S	Spike_N501Y	NSP3_I1412T	NS8_R52I	Spike_P681H	Spike_Y144del	NSP6_G107del	NSP3_A890D	Spike_D1118H	NSP6_F108del	NS8_Y73C	N_G204R	Spike_V70del	NSP12_P323L	Spike_D614G	N_D3L	Spike_S982A	N_S235F)
hCoV-19/Iran/GRC-Q-11-108/2021	EPI_ISL_2455505	Spike_H69del	NS8_Q27stop	NSP3_T183I	Spike_T716I	NSP6_S106del	N_R203K	Spike_A570D	NSP13_K460R	NSP13_P78S	Spike_N501Y	NSP3_I1412T	NS8_R52I	Spike_P681H	Spike_Y144del	NSP6_G107del	NSP3_A890D	Spike_D1118H	NSP6_F108del	NS8_Y73C	N_G204R	Spike_V70del	NSP12_P323L	Spike_D614G	N_D3L	Spike_S982A	N_S235F)
hCoV-19/Iran/GRC-Q-11-109/2021	EPI_ISL_2455507	NS8_Q27stop	N_R203K	NSP3_Q180H	NSP2_L501F	NSP3_K1693N	N_A208del	Spike_D138Y	NSP9_Q49K	NS8_S67del	Spike_Q677H	NSP3_S126L	Spike_S477N	NS8_K68E	N_R209del	NS8_G66del	NSP12_G137C	N_G204R	N_A211del	N_M210del	NSP12_P323L	Spike_D614G	M_I73M	N_P207del	NSP4_I345V	NSP6_R93C	N_S235F)
hCoV-19/Iran/GRC-Sh-11-104/2021	EPI_ISL_2455556	N_D377Y	NSP4_R305K	N_A119S	Spike_H49Y	N_S194L	NSP2_L501F	NS3_Q57H	Spike_I210del	Spike_G181V	NSP15_K109N	NSP12_P323L	NSP14_D375G	Spike_D614G	NSP4_A307T	N_S235F)
hCoV-19/Iran/GRC-Sh-11-106/2021	EPI_ISL_2455557	NSP3_S126L	NS8_Q27stop	Spike_S477N	Spike_A1070S	NS8_K68E	N_R203K	NS8_G66del	NS8_Y73C	NSP3_K1693N	NSP12_G137C	N_G204R	Spike_D138Y	Spike_N501Y	NS8_S67del	NSP12_P323L	Spike_D614G	Spike_Y144del	M_I73M	N_D3L	N_S235F)
hCoV-19/Iran/GRC-Sh-11-107/2021	EPI_ISL_2455558	NS8_Q27stop	NSP3_N1457S	NSP2_G12C	NS8_K68stop	N_S194L	NSP3_T1306I	NSP5_P132S	NS3_Q57H	NS8_Y73C	Spike_I210del	NSP6_Y80C	NSP3_S1285F	NSP12_P323L	Spike_D614G	NSP5_L227F)
hCoV-19/Iran/3279/2020	EPI_ISL_2466656	NSP3_S126L	Spike_S477N	NSP12_G137C	Spike_D138Y	NSP12_P323L	N_G178V	Spike_D614G	M_I73M)
hCoV-19/Iran/3533/2020	EPI_ISL_2466657	N_S194L	NS3_Q57H	NSP6_Y80C	Spike_T678S	NSP4_T237I	NSP12_P323L	Spike_D614G	NSP3_A386V	Spike_Q675H)
hCoV-19/Iran/4058/2020	EPI_ISL_2466658	NSP13_A117G	NSP2_V157F	NSP3_T1269I	NSP3_T1365I	NSP4_F216del	N_S194L	NS3_Q57H	NSP16_G71C	NSP6_Y80C	NSP4_E219K	NSP4_D217del	NSP12_P323L	Spike_D614G	Spike_L54F	NSP4_S218del	NSP1_D33E)
hCoV-19/Iran/GRC-T11516/2021	EPI_ISL_2499960	NSP3_E382K	NSP3_S126L	NS8_Q27stop	Spike_S477N	NSP12_G671S	NS8_K68E	N_R203K	NS8_G66del	NSP12_G137C	N_G204R	Spike_D138Y	NS8_S67del	NSP12_P323L	Spike_D614G	NSP3_A496V	M_I73M)
hCoV-19/Iran/GRC-T11526/2021	EPI_ISL_2499968	NSP13_S485L	N_M234I	NSP3_T725A	NS3_Q57H	N_D3Y	NSP12_N911D	NSP13_A296S	NS3_T223I	NSP2_E478G	NSP12_P323L	Spike_D614G	NSP2_S138L)
hCoV-19/Iran/GRC-T11560/2021	EPI_ISL_2499970	NSP3_S126L	Spike_S477N	NS3_A99V	NS8_K68E	N_R203K	NS8_G66del	NSP3_M560I	NSP13_C441S	NSP12_G137C	N_G204R	NSP2_K239N	Spike_D138Y	NSP9_Q49K	NS8_S67del	NSP12_P323L	Spike_D614G	NSP1_D48N	Spike_Y144del	M_I73M)
hCoV-19/Iran/GRC-T11584/2021	EPI_ISL_2500015	Spike_H69del	NSP13_S485L	NS8_Q27stop	NSP3_T183I	Spike_T716I	NSP6_S106del	N_R203K	Spike_A570D	NSP13_A296S	Spike_N501Y	NSP3_I1412T	NS7a_S83L	NSP2_E478G	Spike_P681H	NSP2_S138L	Spike_Y144del	NSP3_T725A	NSP6_G107del	NSP3_A890D	Spike_D1118H	NSP6_F108del	NS8_Y73C	N_G204R	Spike_V70del	NSP12_P323L	Spike_D614G	N_D3L	Spike_S982A	N_S235F)
hCoV-19/Iran/GRC-Krj-12-103/2021	EPI_ISL_2536155	NSP3_S126L	Spike_S477N	NSP2_T388I	NS8_K68E	NS3_S117I	N_R203K	NS8_G66del	NSP12_G137C	N_G204R	Spike_D138Y	NS8_S67del	NSP12_P323L	Spike_D614G	M_I73M	NSP15_K12N)
hCoV-19/Iran/GRC-Krj-12-105/2021	EPI_ISL_2536156	Spike_D138H	NSP2_E575K	NSP13_S485L	NS3_A33S	N_M234I	NSP12_M666I	Spike_K558N	NS3_Q57H	N_D3Y	NSP3_V393A	N_E378Q	NSP12_P323L	NSP3_E374V	Spike_D614G	NSP3_T24I)
hCoV-19/Iran/GRC-Krj-12-107/2021	EPI_ISL_2536157	Spike_H69del	NS8_Q27stop	NSP3_T183I	Spike_S151I	Spike_T716I	NS8_K68stop	NSP6_S106del	N_R203K	Spike_A570D	Spike_N501Y	Spike_L699I	NSP3_I1412T	NS7a_S83L	NS8_R52I	Spike_P681H	Spike_Y144del	NSP6_G107del	NSP3_A890D	Spike_D1118H	NSP6_F108del	NS8_Y73C	N_G204R	Spike_V70del	Spike_I100T	NSP12_P323L	Spike_D614G	N_D3L	Spike_S982A	N_S235F)
hCoV-19/Iran/GRC-Krj-12-108/2021	EPI_ISL_2536158	Spike_H69del	NS8_Q27stop	NSP3_T183I	Spike_T716I	NSP6_S106del	N_R203K	Spike_A570D	NSP13_K460R	NSP13_P78S	Spike_N501Y	NSP3_I1412T	NS8_R52I	Spike_P681H	Spike_Y144del	NSP6_G107del	NSP3_A890D	Spike_D1118H	NSP6_F108del	NS8_Y73C	N_G204R	Spike_V70del	NSP12_P323L	Spike_D614G	N_D3L	Spike_S982A	N_S235F)
hCoV-19/Iran/GRC-Krj-12-111/2021	EPI_ISL_2536160	NS8_K68E	N_S194L	N_S193I	NS8_G66del	NS3_Q57H	Spike_I210del	NSP6_Y80C	NSP1_S166G	NS8_S67del	NSP12_P323L	Spike_D614G	NSP13_S74P)
hCoV-19/Iran/GRC-Krj-12-112/2021	EPI_ISL_2536181	Spike_H69del	NS8_Q27stop	NSP3_T183I	Spike_T716I	NS8_K68stop	NSP6_S106del	N_R203K	Spike_A570D	Spike_T732I	Spike_N501Y	Spike_L699I	NSP3_I1412T	NS7a_S83L	Spike_P681H	Spike_Y144del	NSP6_G107del	NSP4_A22V	NSP3_A890D	Spike_D1118H	NSP6_F108del	NS8_Y73C	N_G204R	Spike_V70del	Spike_I100T	NSP12_P323L	Spike_D614G	N_D3L	Spike_S982A	N_S235F)
hCoV-19/Iran/GRC-Krj-12-113/2021	EPI_ISL_2537078	NSP3_S126L	Spike_S477N	NS8_K68E	N_R203K	NS8_G66del	NSP12_G137C	N_G204R	Spike_D138Y	NSP3_C1392F	NSP8_A14T	NS8_S67del	NSP12_P323L	Spike_D614G	M_I73M)
hCoV-19/Iran/GRC-Ahv-12-102/2021	EPI_ISL_2537387	Spike_H69del	NS8_Q27stop	NSP3_T183I	Spike_T716I	NS8_K68stop	NSP6_S106del	N_R203K	Spike_A570D	Spike_N501Y	Spike_L699I	NSP3_I1412T	NS7a_S83L	NS8_R52I	Spike_P681H	Spike_Y144del	NSP6_G107del	NSP3_A890D	Spike_D1118H	NSP6_F108del	NS8_Y73C	NSP3_E1294D	N_G204R	Spike_V70del	Spike_I100T	NSP12_P323L	Spike_S704L	Spike_D614G	N_D3L	Spike_S982A	N_S235F)
hCoV-19/Iran/12624/2020	EPI_ISL_2537485	N_A35E	NSP2_V198I	NSP8_T187I	M_T175M)
hCoV-19/Iran/GRC-Ahv-12-105/2021	EPI_ISL_2547336	Spike_H69del	NS8_Q27stop	NSP3_T183I	Spike_T716I	NS8_K68stop	NSP6_S106del	N_R203K	Spike_A570D	Spike_N501Y	Spike_L699I	NSP3_I1412T	NS7a_S83L	NS8_R52I	Spike_P681H	Spike_Y144del	Spike_A222V	NSP6_G107del	NSP3_A890D	Spike_D1118H	NSP6_F108del	NS8_Y73C	N_G204R	Spike_V70del	Spike_I100T	NSP12_P323L	Spike_D614G	N_D3L	Spike_S982A	N_S235F)
hCoV-19/Iran/GRC-Ahv-12-111/2021	EPI_ISL_2547337	Spike_H69del	NS8_Q27stop	NSP3_T183I	Spike_T716I	NS8_K68stop	NSP6_S106del	N_R203K	Spike_A570D	Spike_N501Y	Spike_L699I	NSP3_I1412T	NS7a_S83L	NS8_R52I	Spike_P681H	Spike_Y144del	NSP6_G107del	NSP3_A890D	Spike_D1118H	NSP6_F108del	NS8_Y73C	N_G204R	Spike_V70del	Spike_I100T	NSP12_P323L	Spike_D614G	N_D3L	Spike_S982A	N_S235F)
hCoV-19/Iran/GRC-Ahv-12-120/2021	EPI_ISL_2547339	Spike_H69del	NS8_Q27stop	NSP3_T183I	Spike_T716I	NS8_K68stop	NSP6_S106del	N_R203K	Spike_A570D	Spike_N501Y	Spike_L699I	NSP3_I1412T	NS7a_S83L	NS8_R52I	Spike_P681H	Spike_Y144del	NSP6_G107del	NSP3_A890D	Spike_D1118H	NSP6_F108del	NS8_Y73C	N_G204R	Spike_V70del	Spike_I100T	NSP12_P323L	Spike_D614G	N_D3L	Spike_S982A	N_S235F)
hCoV-19/Iran/GRC-Ahv-12-122/2021	EPI_ISL_2547428	Spike_H69del	NS8_Q27stop	NSP7_S54L	NSP3_T183I	Spike_T716I	NSP6_S106del	N_R203K	Spike_A570D	NSP13_K460R	NSP13_P78S	Spike_N501Y	NSP3_I1412T	NS8_R52I	Spike_P681H	Spike_Y144del	NSP6_G107del	NSP3_A890D	Spike_D1118H	NSP6_F108del	NS8_Y73C	N_G204R	Spike_V70del	NSP12_P323L	Spike_D614G	N_D3L	Spike_S982A	N_S235F)
hCoV-19/Iran/GRC-Ahv-12-124/2021	EPI_ISL_2547522	Spike_H69del	NS8_Q27stop	NSP3_T183I	Spike_T716I	NS8_K68stop	NSP6_S106del	N_R203K	Spike_A570D	Spike_N501Y	Spike_L699I	NSP3_I1412T	NS7a_S83L	NS8_R52I	Spike_P681H	Spike_Y144del	NSP6_G107del	NSP3_A890D	Spike_D1118H	NSP6_F108del	NS8_Y73C	N_G204R	Spike_V70del	Spike_I100T	NSP12_P323L	Spike_D614G	N_D3L	Spike_S982A	N_S235F)
hCoV-19/Iran/GRC-GHOM-12-103/2021	EPI_ISL_2547523	Spike_H69del	NS8_Q27stop	NSP3_T183I	NSP3_T1348I	Spike_T716I	NS8_K68stop	NSP6_S106del	N_R203K	Spike_A570D	Spike_N501Y	Spike_E1150A	Spike_L699I	NSP3_I1412T	NS7a_S83L	NS8_R52I	Spike_P681H	Spike_Y144del	NSP6_G107del	NSP3_A890D	Spike_D1118H	NSP6_F108del	NS8_Y73C	N_G204R	Spike_V70del	Spike_I100T	NSP12_P323L	Spike_D614G	N_D3L	Spike_S982A	N_S235F)
hCoV-19/Iran/GRC-HAM-11-110/2021	EPI_ISL_2548847	NSP3_S126L	NSP2_D43G	Spike_S477N	NS8_K68E	N_R203K	NSP3_Q180H	NS8_G66del	NSP12_G137C	N_G204R	Spike_D138Y	NSP9_Q49K	NS8_S67del	NSP12_P323L	Spike_D614G	M_I73M)
hCoV-19/Iran/GRC-2287/2020	EPI_ISL_2691710	NSP2_V198I	NS7a_I3L	N_S186F	NSP6_L37F	NSP16_G77R	Spike_T22I)
hCoV-19/Iran/GRC-4488/2020	EPI_ISL_2692885	NSP2_V198I	NSP6_L37F	NSP3_E906D)
hCoV-19/Iran/GRC-6176/2020	EPI_ISL_2692888	NSP2_V198I	N_K248N	NSP4_A380V	NS3_D155Y	Spike_A706V	Spike_D614G	NSP6_L37F)
hCoV-19/Iran/GRC-6273/2020	EPI_ISL_2692890	N_S194L	NS3_Q57H	NSP12_P323L	Spike_D614G)
hCoV-19/Iran/GRC-7773/2020	EPI_ISL_2692893	NSP13_H290Y	NSP3_R352C	NSP12_P323L	Spike_D614G	NSP2_S138L)
hCoV-19/Iran/GRC-8557/2020	EPI_ISL_2692895	NSP2_V198I	NSP13_R392C	NS3_P42L	Spike_H655Y	NSP4_S483F	NSP14_S369F	Spike_T20A	N_A252S	N_N192K	NSP6_L37F	NSP13_F475V)
hCoV-19/Iran/GRC-9136/2020	EPI_ISL_2692901	NSP13_H290Y	NSP12_P323L	Spike_D614G)
hCoV-19/Iran/GRC-9204/2020	EPI_ISL_2692904	NSP2_V198I	NSP3_S1285F	NSP6_L37F	NSP3_S1424F)
hCoV-19/Iran/GRC-9473/2020	EPI_ISL_2692906	Spike_Q675R	NSP2_V198I	NSP4_S137L	N_M234I	Spike_D936Y	Spike_D1163Y	M_G78D	NSP15_A171V	NSP2_G481S	NSP12_T604I	NSP2_G548C	NSP6_L37F	NSP8_V34F	NSP14_G114C)
hCoV-19/Iran/GRC-9635/2020	EPI_ISL_2692907	NSP2_V198I	NSP3_L689F	NSP6_L37F	N_A220V	NS3_T223A)
hCoV-19/Iran/GRC-9842/2020	EPI_ISL_2692908	N_S194L	NS3_Q57H	NSP3_P340L	NSP12_P323L	Spike_D614G)
hCoV-19/Iran/GRC-9933/2020	EPI_ISL_2692910	NS3_Q57H	NSP12_P323L	Spike_D614G)
hCoV-19/Iran/GRC-10074/2020	EPI_ISL_2692953	NSP2_V198I	NSP3_T942I	NSP3_L689F	Spike_D614G	NSP6_L37F	N_A220V	NS3_T223A)
hCoV-19/Iran/GRC-10306/2020	EPI_ISL_2692982	NSP13_S485L	N_M234I	NS3_Q57H	NSP12_P323L	Spike_D614G)
hCoV-19/Iran/GRC-10356/2020	EPI_ISL_2692984	N_Q39E	N_R203K	N_G204R	NSP13_A520V	NSP12_P323L	Spike_D614G	N_A211V	NSP3_D271A)
hCoV-19/Iran/GRC-10532/2020	EPI_ISL_2692985	NSP13_H290Y	NS7a_T28I	NSP16_P215L	NSP14_A497S	NSP12_P323L	Spike_D614G)
hCoV-19/Iran/GRC-10617/2020	EPI_ISL_2692988	N_S194L	N_P13T	NS3_Q57H	Spike_T998P	NSP12_L638F	NSP12_P323L	Spike_D614G)
hCoV-19/Iran/GRC-20/2020	EPI_ISL_2693672	NSP2_V198I	Spike_E180K	N_A308S	N_S186F	NSP6_L37F	NSP16_G77R	Spike_T22I)
hCoV-19/Iran/GRC-22/2020	EPI_ISL_2693673	NSP2_V198I	NSP2_R27C	NSP14_A225T	NSP12_T402I	NSP4_M33I	NSP6_L37F	NSP14_T16I	NS3_S171L)
hCoV-19/Iran/GRC-32/2020	EPI_ISL_2693674	NSP2_V198I	NS3_S177I	NSP12_V405I	N_R209I	NSP6_L37F)
hCoV-19/Iran/GRC-60/2020	EPI_ISL_2693675	NSP2_V198I	NSP2_R27C	N_M234I	NSP4_M33I	NSP6_L37F)
hCoV-19/Iran/GRC-63/2020	EPI_ISL_2693676	NSP2_V198I	NSP6_L37F)
hCoV-19/Iran/GRC-78/2020	EPI_ISL_2693905	NSP2_V198I	NSP2_G12S	NSP6_L37F)
hCoV-19/Iran/GRC-81/2020	EPI_ISL_2693906	NSP2_V198I	NSP3_P74S	NSP6_L37F)
hCoV-19/Iran/GRC-89/2020	EPI_ISL_2693907	NSP2_V198I	NSP6_L37F)
hCoV-19/Iran/GRC-3/2020	EPI_ISL_2693908	NSP2_V198I	NSP2_R27C	NSP6_M83I	NSP4_M33I	NSP6_L37F)
hCoV-19/Iran/GRC-4/2020	EPI_ISL_2693972	NSP2_V198I	NSP4_T37I	NSP6_L37F)
hCoV-19/Iran/GRC-5/2020	EPI_ISL_2694195	NSP2_V198I	N_N192K	NSP6_L37F	NSP3_V1248M	NSP13_F475V)
hCoV-19/Iran/GRC-6/2020	EPI_ISL_2694587	NSP2_V198I	N_S184F	NSP6_L37F)
hCoV-19/Iran/GRC-7/2020	EPI_ISL_2694588	NSP2_V198I	N_P13L	NSP6_L37F	NSP13_I35V)
hCoV-19/Iran/GRC-8/2020	EPI_ISL_2694589	NSP2_V198I	N_S186F	NSP12_S68F	NSP4_V212L	NSP6_L37F	NSP16_G77R	NS7b_A15S	NSP3_S1424F	Spike_T22I)
hCoV-19/Iran/GRC-9/2020	EPI_ISL_2694590	NSP2_V198I	NS3_R126K	N_G204R	NSP12_V405I	NSP5_K90R	NSP6_L37F)
hCoV-19/Iran/GRC-10/2020	EPI_ISL_2694591	NSP2_V198I	NSP14_P203L	NS3_V112F	NSP3_L689F	Spike_D614G	NSP6_L37F	N_A220V	NS3_T223A)
hCoV-19/Iran/GRC-11/2020	EPI_ISL_2694592	NSP2_V198I	NSP3_P192S	Spike_E180K	N_S186F	NSP6_L37F	NSP16_G77R	NSP14_A96V	Spike_T22I)
hCoV-19/Iran/GRC-T9778/2020	EPI_ISL_2697797	NSP3_S126L	Spike_S477N	NSP3_T1429N	NS8_K68E	N_R203K	NS8_G66del	NSP3_E1252G	NSP12_G137C	N_G204R	Spike_D138Y	NS8_S67del	NSP12_P323L	Spike_D614G	NSP6_L37F	M_I73M)
hCoV-19/Iran/GRC-T9862/2020	EPI_ISL_2697882	N_S194L	NSP5_T21I	NS3_Q57H	Spike_I210del	NSP12_P323L	Spike_D614G	NSP3_S1437F)
hCoV-19/Iran/GRC-T9972/2020	EPI_ISL_2698324	NSP2_T160I	N_S194L	NS3_Q57H	Spike_I210del	NSP2_M418I	NS3_T223I	N_G34W	NSP12_P323L	Spike_D614G	N_A90S)
hCoV-19/Iran/GRC-teh26124/2021	EPI_ISL_2699426	NSP3_S126L	Spike_S477N	NS8_K68E	N_R203K	NSP3_E122D	NS8_G66del	NSP12_G137C	N_G204R	N_R209G	Spike_D138Y	NSP1_G112S	NS8_S67del	NSP12_P323L	NSP3_A333V	Spike_D614G	M_I73M)
hCoV-19/Iran/GRC-T9994/2020	EPI_ISL_2715364	NSP3_S126L	Spike_S477N	NS8_K68E	N_R203K	NS8_G66del	NSP12_G228D	NSP12_G137C	N_G204R	NSP3_L1361F	Spike_D138Y	NS8_S67del	NSP12_P323L	Spike_D614G	M_I73M)
hCoV-19/Iran/T10013/2020	EPI_ISL_2715365	NSP2_K333R	N_S194L	NSP2_A318V	NS3_Q57H	Spike_I210del	NSP6_Y80C	NSP12_P323L	Spike_D614G	N_E290Q	N_N196I)
hCoV-19/Iran/GRC-T10020/2020	EPI_ISL_2715366	Spike_M1237I	Spike_S477N	NS8_K68E	N_R203K	NS8_G66del	NS3_Q57H	NSP12_G137C	Spike_I210del	NS3_D210Y	N_G204R	NSP13_P53S	NSP9_Q49K	NS8_S67del	NSP12_P323L	Spike_D614G	M_I73M	NSP16_I267V)
hCoV-19/Iran/GRC-T10030/2020	EPI_ISL_2715367	NSP1_R24C	N_S194L	NSP3_A1324V	NS3_Q57H	Spike_I210del	NSP6_Y80C	NSP12_P323L	Spike_D614G	N_N196I	NSP3_S1717L)
hCoV-19/Iran/GRC-T10247/2020	EPI_ISL_2716473	N_M234I	N_S194L	N_P80L	NS3_A110V	NSP2_T573A	NSP12_P323L	N_A273S	Spike_D614G)
hCoV-19/Iran/T10288/2020	EPI_ISL_2716475	Spike_Q52H	NSP5_T93A	N_S194L	NSP4_A231V	NS3_Q57H	Spike_I210del	NSP15_V22L	N_G34W	NSP12_P323L	Spike_D614G	NSP6_L37F	Spike_D253G)
hCoV-19/Iran/GRC-T10301/2020	EPI_ISL_2716476	NSP3_S126L	NSP14_R163C	Spike_S477N	NS8_K68E	N_R203K	NS8_G66del	NSP12_G137C	N_G204R	Spike_D138Y	NSP9_Q49K	NS8_S67del	NSP12_P323L	Spike_D614G	M_I73M	NSP3_S1467F)
hCoV-19/Iran/GRC-T10303/2020	EPI_ISL_2716640	N_R203K	NSP4_D279N	NS6_T21I	NSP3_D411Y	N_G204R	NSP12_P323L	Spike_D614G	NSP12_G108V)
hCoV-19/Iran/GRC-T10304/2020	EPI_ISL_2716724	Spike_V1264L	Spike_Y837H	N_S194L	NS3_Q57H	Spike_I210del	NSP12_P323L	Spike_D614G)
hCoV-19/Iran/T10313/2020	EPI_ISL_2716740	NSP3_S126L	Spike_S477N	NS8_K68E	N_R203K	NS8_G66del	NSP12_G137C	N_G204R	E_T9I	Spike_D138Y	NS3_V256I	NS8_S67del	NSP12_P323L	Spike_D614G	M_I73M)
hCoV-19/Iran/GRC-T10338/2020	EPI_ISL_2716741	NSP3_T1465I	NS7a_L86M	NSP14_T524I	N_S194L	NS3_Q57H	Spike_I210del	NSP6_Y80C	NSP12_P323L	Spike_D614G	NSP8_T141M)
hCoV-19/Iran/GRC-T10343/2020	EPI_ISL_2716742	N_M234I	N_S194L	N_P80L	NSP12_G137C	NSP13_V348M	NS3_A110V	NSP2_T573A	NSP12_P323L	N_A273S	Spike_D614G)
hCoV-19/Iran/GRC-T10467/2020	EPI_ISL_2716834	NSP3_S126L	Spike_S477N	NS8_K68E	N_R203K	NS8_G66del	NSP12_G137C	N_G204R	Spike_D138Y	NSP9_Q49K	NS8_S67del	NSP12_P323L	Spike_D614G	M_I73M)
hCoV-19/Iran/GRC-T10709/2020	EPI_ISL_2716836	NSP6_M86I	NSP2_P129L	NS8_E92K	NS8_I58del	Spike_P681R	N_S202N	NSP6_M183I	NS8_L84S	NSP6_L98F	Spike_Q613H)
hCoV-19/Iran/GRC-T10716/2020	EPI_ISL_2716837	NSP3_S126L	Spike_S477N	NS8_K68E	N_R203K	N_K375N	NS8_G66del	NSP13_T481M	NSP12_G137C	NS8_W45stop	N_G204R	NS8_S67del	N_A173V	NSP3_P1228L	NSP12_P323L	Spike_D614G	M_I73M)
hCoV-19/Iran/GRC-T10749/2020	EPI_ISL_2716838	NSP3_S126L	Spike_R78M	Spike_S477N	NS8_K68E	N_R203K	NS8_G66del	NSP12_G137C	N_G204R	Spike_D138Y	NS8_S67del	NSP12_P323L	Spike_D614G	M_I73M)
hCoV-19/Iran/GRC-T10808/2020	EPI_ISL_2716954	NSP3_S126L	Spike_S477N	NS8_K68E	N_R203K	NSP2_T166I	NSP3_T976I	NS8_G66del	NSP12_G137C	N_G204R	Spike_D138Y	NS8_S67del	NSP12_P323L	Spike_D614G	M_I73M)
hCoV-19/Iran/GRC-T10822/2020	EPI_ISL_2727647	NSP10_V119I	N_S194L	N_G243C	NSP3_T656I	NS3_Q57H	Spike_I210del	N_G34W	NSP12_P323L	NSP6_M183I	Spike_D614G	NSP14_V14L	NSP2_K557E)
hCoV-19/Iran/GRC-T10836/2020	EPI_ISL_2727648	NSP3_S126L	Spike_S477N	NS8_K68E	N_R203K	NSP2_T166I	NSP3_T976I	NS8_G66del	NSP12_G137C	N_G204R	Spike_D138Y	NS8_S67del	NSP12_P323L	Spike_D614G	M_I73M)
hCoV-19/Iran/T10889/2020	EPI_ISL_2727649	NSP4_T73I	N_S194L	NS3_Q57H	Spike_I210del	NSP3_A1183V	N_G34W	NSP12_P323L	Spike_D614G)
hCoV-19/Iran/GRC-T10934/2020	EPI_ISL_2727650	NSP3_S126L	N_G212C	Spike_S477N	NSP5_P168S	NS8_K68E	N_R203K	NS8_G66del	NSP12_G137C	N_G204R	Spike_D138Y	NS8_S67del	NSP12_P323L	NSP5_K90R	Spike_D614G	M_I73M)
hCoV-19/Iran/GRC-T10952/2020	EPI_ISL_2727652	N_S194L	NS3_Q57H	Spike_I210del	NSP6_Y80C	NSP3_S1542G	NSP12_P323L	Spike_D614G)
hCoV-19/Iran/T11093/2021	EPI_ISL_2727655	NSP6_A51V	N_S194L	NS3_Q57H	Spike_I210del	NSP6_Y80C	NSP8_A13T	NSP3_E49K	NSP12_P323L	NSP3_Q1884H	Spike_D614G)
hCoV-19/Iran/GRC-T11095/2021	EPI_ISL_2727657	N_T417I	N_S194L	NS3_Q57H	Spike_I210del	NSP6_Y80C	NS8_I9T	NSP2_S196L	NSP16_D179G	NSP12_P323L	Spike_D614G)
hCoV-19/Iran/GRC-T11100/2021	EPI_ISL_2727668	NSP2_E309V	NSP3_S126L	Spike_S477N	NS8_K68E	N_R203K	NS8_G66del	NSP12_G137C	N_G204R	Spike_D138Y	NSP8_A14T	NS8_S67del	NSP12_P323L	Spike_D614G	M_I73M	NS7a_T14I)
hCoV-19/Iran/T11101/2021	EPI_ISL_2727669	NSP3_S126L	Spike_S477N	NS8_K68E	N_R203K	N_K375N	NS8_G66del	NSP13_T481M	NSP12_G137C	N_G204R	NS8_S67del	N_A173V	NSP3_P1228L	NSP12_P323L	Spike_D614G	M_I73M)
hCoV-19/Iran/GRC-T11124/2021	EPI_ISL_2727670	NSP3_S126L	Spike_S477N	NS3_P240L	NS8_K68E	N_R203K	NS8_G66del	NSP12_G137C	N_G204R	Spike_D138Y	NSP9_Q49K	NS8_S67del	NSP12_P323L	NSP3_V1704I	Spike_D614G	M_I73M	Spike_Q677H)
hCoV-19/Iran/GRC-33305/2020	EPI_ISL_2727671	N_A414S	N_R203K	N_G204R	NSP12_P323L	Spike_D1260H	Spike_D614G	N_A211V	NSP14_E2G)
hCoV-19/Iran/GRC-33316/2020	EPI_ISL_2727672	NSP3_S126L	NSP3_S1160T	Spike_S477N	NS8_K68E	N_R203K	NS8_G66del	NSP13_T481M	NSP12_G137C	N_G204R	NSP14_V263I	Spike_D138Y	NS8_S67del	NSP12_P323L	Spike_D614G	M_I73M)
hCoV-19/Iran/GRC-G33337/2020	EPI_ISL_2727799	NSP9_M101V	Spike_T95I	NS7a_L116F	N_S194L	Spike_I68T	NS3_Q57H	Spike_I210del	NSP6_Y80C	NSP12_P323L	Spike_D614G)
hCoV-19/Iran/GRC-G33487/2020	EPI_ISL_2727874	NSP13_Y324C	Spike_K1191N	N_S194L	NS3_Q57H	Spike_I210del	NSP12_P323L	Spike_D614G)
hCoV-19/Iran/GRC-G33558/2020	EPI_ISL_2727875	N_R195I	N_S194L	NS3_Q57H	Spike_I210del	NSP3_I1426T	Spike_K1205R	NSP12_M196I	NSP12_P323L	Spike_D614G	Spike_D80Y	N_G25C)
hCoV-19/Iran/GRC-G33954/2020	EPI_ISL_2727889	N_S194L	NS3_Q57H	Spike_I210del	NSP3_P153L	NSP13_A296S	NSP2_G481S	NSP12_P323L	Spike_D614G	N_Q239L	N_Q389H	NS7a_T111I	NSP14_M501I)
hCoV-19/Iran/GRC-7202B/2021	EPI_ISL_2795653	NSP5_I78N	N_R203K	NSP6_T181I	N_G204R	NSP2_P13L	NSP15_V172L	Spike_D138Y	NSP12_P323L	Spike_D614G)
hCoV-19/Iran/GRC-7264B/2021	EPI_ISL_2795654	NSP3_S126L	Spike_S477N	NS3_S165F	NS8_K68E	N_R203K	NS8_G66del	NSP13_T481M	NSP12_G137C	N_G204R	Spike_D138Y	NS8_S67del	NSP12_P323L	Spike_D614G	M_I73M)
hCoV-19/Iran/GRC-7334B/2021	EPI_ISL_2795656	NSP1_A117T	N_S194L	NS3_Q57H	Spike_I210del	NSP6_Y80C	NSP12_P323L	Spike_D614G	N_T16M)
hCoV-19/Iran/GRC-T-I-11-101/2021	EPI_ISL_2795659	Spike_H69del	NS8_Q27stop	NSP3_T183I	NS7a_T39I	Spike_T716I	NSP6_S106del	N_R203K	Spike_A570D	Spike_D215Y	Spike_N501Y	NSP3_I1412T	NS8_R52I	Spike_P681H	Spike_Y144del	NS3_G100C	NSP16_S240A	NSP6_G107del	NSP3_A890D	Spike_D1118H	NSP6_F108del	NS8_Y73C	N_G204R	Spike_V70del	NSP12_P323L	Spike_D614G	N_D3L	Spike_S982A	N_S235F)
hCoV-19/Iran/GRC-T-I-11-102/2021	EPI_ISL_2795660	NSP13_P419S	NSP3_T181I	N_R203K	NSP13_Y253H	N_G204R	Spike_C1248F	NSP3_M1788I	NSP3_G116D	NS8_E106stop	NSP12_P323L	Spike_D614G	N_A211V	N_T16M)
hCoV-19/Iran/T.I.11.111/2021	EPI_ISL_2795673	NSP3_S126L	Spike_S477N	NS8_K68E	N_R203K	NS8_G66del	NSP12_G137C	N_G204R	Spike_D138Y	NS3_V256I	NS8_S67del	NSP12_P323L	NS7a_Q90stop	Spike_D614G	M_I73M)
hCoV-19/Iran/GRC-T-I-11-113/2021	EPI_ISL_2795674	NSP3_S126L	Spike_S477N	NS8_K68E	NSP3_R352C	N_R203K	NS3_L53F	NS8_G66del	NSP13_T481M	NSP12_G137C	N_G204R	NSP2_I515V	Spike_D138Y	NS8_S67del	NSP12_P323L	Spike_D614G	M_I73M)
hCoV-19/Iran/GRC-T-I-11-114/2021	EPI_ISL_2795675	NSP2_S378F	NSP3_S126L	N_A414S	Spike_S477N	NS8_K68E	N_R203K	NS8_G66del	NSP13_T481M	NSP12_G137C	N_G204R	Spike_D138Y	NS3_A143T	NS8_S67del	NSP12_P323L	Spike_D614G	M_I73M)
hCoV-19/Iran/GRC-T-I-11-115/2021	EPI_ISL_2795676	NSP3_P679L	NSP3_T1004I	M_L29F	N_S194L	NSP6_K270R	NS3_Q57H	Spike_T859N	Spike_I210del	NSP4_A457V	Spike_L5F	NSP3_S1675G	Spike_T572I	NSP1_Q63R	NSP12_P323L	Spike_D614G	NSP6_L37F)
hCoV-19/Iran/GRC-T-I-11-116/2021	EPI_ISL_2795677	Spike_W104C	Spike_S477N	NS8_K68E	N_R203K	NS8_G66del	NSP3_T725I	NSP12_G137C	N_G204R	NS8_S67del	M_H155Y	NSP12_P323L	Spike_D614G	M_I73M	Spike_T22I)
hCoV-19/Iran/GRC-T-I-11-117/2021	EPI_ISL_2795678	Spike_H69del	NS8_Q27stop	NSP3_T183I	NS7a_T39I	Spike_T716I	NSP6_S106del	N_R203K	Spike_A570D	Spike_N501Y	NSP3_I1412T	NS8_R52I	Spike_P681H	Spike_Y144del	NS3_G100C	NSP6_G107del	NSP3_A890D	Spike_D1118H	NSP6_F108del	NS8_Y73C	N_G204R	Spike_V70del	NSP12_P323L	Spike_D614G	N_D3L	Spike_S982A	N_S235F)
hCoV-19/Iran/GRC-T-I-11-118/2021	EPI_ISL_2795679	NSP16_A188S	NSP2_A336V	N_S194L	NSP3_S370L	NSP10_T101I	NS3_Q57H	NSP12_T769A	Spike_I210del	NS8_G8V	NSP6_Y80C	NSP12_P323L	Spike_D614G)
hCoV-19/Iran/GRC-T-I-11-119/2021	EPI_ISL_2795680	NSP3_S126L	Spike_W104C	Spike_S477N	NS8_K68E	N_R203K	NS8_G66del	NSP12_G137C	N_G204R	Spike_D138Y	NS8_S67del	NSP12_P323L	Spike_D614G	M_I73M	Spike_A771S	NSP13_T214I)
hCoV-19/Iran/GRC-T-I-11-120/2021	EPI_ISL_2795920	NSP3_S126L	Spike_S477N	NSP9_R74S	NS8_K68E	N_R203K	NS8_G66del	NSP12_G137C	N_G204R	NSP14_V167L	Spike_D138Y	NSP9_Q49K	NS8_S67del	NSP12_P323L	Spike_D614G	NS3_E239D	M_I73M)
hCoV-19/Iran/GRC-T-I-11-121/2021	EPI_ISL_2795966	NSP3_S126L	NS8_Q27stop	Spike_W104C	Spike_S477N	NSP6_A136V	NS8_K68E	N_R203K	NS8_G66del	NS8_Y73C	NSP12_G137C	N_G204R	Spike_D138Y	NSP9_Q49K	NS8_S67del	NSP12_P323L	Spike_D614G	N_D216E	NSP3_E308D	M_I73M	N_S235F)
hCoV-19/Iran/GRC-T-I-11-122/2021	EPI_ISL_2795967	NS8_Q27stop	NSP6_G107del	NSP6_S106del	N_R203K	NSP6_F108del	NS3_Q57H	NS8_Y73C	Spike_I210del	N_G204R	NSP12_V405F	NS3_P240R	NSP12_P323L	Spike_D614G	Spike_Y144del	N_D3L	N_S235F)
hCoV-19/Iran/GRC-T-I-11-124/2021	EPI_ISL_2796504	NSP3_A41V	N_D377Y	NSP3_A450V	NSP2_I273V	N_S194L	NSP3_N1680S	NS3_Q57H	Spike_I210del	NSP3_P1921L	NSP15_T48K	NSP4_V344I	Spike_A1020S	NSP6_L217V	NSP12_P323L	Spike_D614G	Spike_G261R	Spike_H146Q	NSP3_S1424F)
hCoV-19/Iran/GRC-T-I-11-125/2021	EPI_ISL_2796505	NS8_Q27stop	NSP3_T183I	Spike_T716I	NSP6_S106del	N_R203K	Spike_A570D	Spike_D138Y	NSP9_Q49K	NS8_S67del	NSP3_I1412T	Spike_P681H	Spike_Y144del	NSP3_S126L	Spike_W104C	Spike_S477N	NSP6_G107del	NS8_K68E	Spike_D1118H	NSP6_F108del	NS8_G66del	NSP2_L24F	NS8_Y73C	NSP12_G137C	N_G204R	NSP12_P323L	NSP2_V425G	Spike_D614G	M_I73M	N_D3L	Spike_S982A	N_S235F)
hCoV-19/Iran/GRC-T-I-11-126/2021	EPI_ISL_2796506	NSP3_S126L	Spike_S477N	NS8_K68E	N_R203K	NS8_G66del	NSP2_L24F	NSP12_G137C	N_G204R	Spike_D138Y	NSP9_Q49K	NS8_S67del	NSP12_P323L	NSP2_V425G	Spike_D614G	M_I73M)
hCoV-19/Iran/T-I-11-127/2021	EPI_ISL_2796507	NSP3_S126L	NS8_Q27stop	Spike_S477N	NS8_K68E	N_R203K	NS8_G66del	NSP12_G137C	N_G204R	Spike_D138Y	NS3_V256I	NS8_S67del	NSP12_P323L	NS7a_Q90stop	Spike_D614G	M_I73M	N_S235F)
hCoV-19/Iran/GRC-RNA E2-N192/2021	EPI_ISL_2835952	Spike_H69del	NS8_Q27stop	NSP3_T183I	Spike_T716I	NSP6_S106del	N_R203K	Spike_A570D	NSP13_K460R	NSP4_F17L	Spike_N501Y	NSP3_I1412T	NS8_R52I	Spike_P681H	Spike_Y144del	NSP6_G107del	NSP3_A890D	Spike_D1118H	NSP6_F108del	NS8_Y73C	N_G204R	Spike_V70del	NSP12_P323L	Spike_D614G	N_D3L	Spike_S982A	N_S235F)
hCoV-19/Iran/GRC-RNAE3-N193/2021	EPI_ISL_2835953	Spike_H69del	NS8_Q27stop	NSP3_T183I	Spike_T716I	NSP6_S106del	N_R203K	Spike_A570D	NSP13_K460R	NSP4_F17L	Spike_N501Y	NSP3_I1412T	NS8_R52I	Spike_P681H	Spike_Y144del	NSP6_G107del	NSP3_A890D	Spike_D1118H	NSP6_F108del	NS8_Y73C	N_G204R	Spike_V70del	NSP2_T547I	NSP12_P323L	Spike_D614G	N_D3L	Spike_S982A	N_S235F)
hCoV-19/Iran/GRC-T9258/2020	EPI_ISL_2835993	NSP16_Q18L	N_R203K	NSP2_A507V	N_G204R	N_R209I	Spike_N501Y	NSP12_P323L	Spike_D614G	NSP3_L1791F)
hCoV-19/Iran/GRC-S8778/2021	EPI_ISL_2836970	NSP3_S126L	NS7b_L11F	E_L73F	Spike_S477N	NSP3_A1736V	NS8_K68E	N_R203K	NSP6_T181I	NS8_G66del	NSP12_G137C	N_G204R	Spike_D138Y	NS8_S67del	NSP12_P323L	Spike_D614G	M_I73M)
hCoV-19/Iran/GRC-S8935/2021	EPI_ISL_2836971	N_S194L	NSP3_E426K	NS3_T223I	NSP12_P323L	Spike_D614G	NSP6_V84F)
hCoV-19/Iran/GRC-S8939/2021	EPI_ISL_2837247	NS3_Q17R	NS3_D173G	N_S194L	NSP3_K1211N	NSP9_T19I	NS3_Q57H	Spike_I210del	NSP6_Y80C	NSP12_A529V	NSP12_P323L	Spike_D614G	NSP3_S1467F)
hCoV-19/Iran/GRC-S8948/2021	EPI_ISL_2838053	NSP16_L126F	N_S194L	NSP2_T223I	NSP2_I367V	NS3_Q57H	Spike_I210del	N_G34W	NSP12_P323L	NSP8_R51C	Spike_D614G	Spike_A222V)
hCoV-19/Iran/GRC-S8957/2021	EPI_ISL_2838054	NSP3_S126L	Spike_S477N	NS8_K68E	NSP2_L217F	N_R203K	NS8_G66del	NSP12_G137C	N_G204R	Spike_D138Y	NS8_S67del	NSP12_P323L	Spike_D614G	M_H125N	M_I73M	Spike_Q14H	NSP3_P125S)
hCoV-19/Iran/GRC-S8958/2021	EPI_ISL_2838055	NSP2_T160I	NS8_K68E	N_S194L	NS8_G66del	NS3_Q57H	Spike_I210del	NS8_S67del	NS3_T223I	N_G34W	NSP12_P323L	Spike_D614G	NSP2_S358L)
hCoV-19/Iran/GRC-S8963/2021	EPI_ISL_2838353	NSP12_D833N	Spike_A27V	NSP13_S485L	N_M234I	NSP3_I1683T	NS8_T26I	NS3_Q57H	N_D3Y	NSP2_T573I	Spike_G1219C	NS3_T223I	Spike_R214P	NSP2_E478G	NSP2_K335E	NSP12_P323L	Spike_D614G)
hCoV-19/Iran/GRC-T9129/2020	EPI_ISL_2838791	NSP14_K349N	N_S194L	NS3_Q57H	Spike_I210del	NS3_L106F	Spike_Y144H	N_G34W	NSP12_P323L	Spike_D614G	NSP6_L37F	NSP3_G1476S)
hCoV-19/Iran/GRC-T-I-11-108/2021	EPI_ISL_2988732	Spike_Q675R	NSP2_A510V	N_S194L	N_P13T	NS3_Q57H	Spike_I210del	NSP12_L638F	NSP13_P172S	NSP12_P323L	Spike_D614G)
hCoV-19/Iran/GRC-T11156/2021	EPI_ISL_2992049	NSP2_E309V	NSP3_S126L	Spike_S477N	NSP3_A1321V	NS8_K68E	N_R203K	NS8_G66del	NSP12_G137C	N_G204R	Spike_D138Y	NSP8_A14T	NS8_S67del	N_P67L	NSP12_P323L	Spike_D614G	M_I73M	NS7a_T14I)
hCoV-19/Iran/GRC-T-I-11-182/2021	EPI_ISL_3038897	NSP2_V198I	NSP4_S483F	NSP2_I42del	N_N192K	NSP6_L37F	NSP13_F475V	N_S235F)
hCoV-19/Iran/GRC-T-I-11-185/2021	EPI_ISL_3038900	NSP2_V198I	M_T208I	NSP3_T942I	Spike_N709K	NSP13_L581F	NS3_V112F	NSP3_L689F	Spike_D614G	NSP6_L37F	N_A220V	NS3_T223A	NSP6_M47I)
hCoV-19/Iran/GRC-T-I-11-186/2021	EPI_ISL_3038901	NSP3_T1482I	N_S194L	NS3_Q57H	Spike_I210del	NS7a_Q76H	NSP6_Y80C	NS8_W45S	NSP12_P323L	Spike_D614G)
hCoV-19/Iran/GRC-T-I-11-187/2021	EPI_ISL_3038902	NSP10_V119I	N_S194L	NSP12_K91R	NS3_Q57H	Spike_I210del	NSP6_Y80C	NSP12_P323L	Spike_D614G	NS8_P30L)
hCoV-19/Iran/GRC-teh9/2021	EPI_ISL_3053154	NSP3_S126L	Spike_S477N	NS3_A51S	NS8_K68E	Spike_V143D	N_R203K	NS8_G66del	NSP12_G137C	N_G204R	Spike_D138Y	NSP9_Q49K	NS8_S67del	NSP14_A138V	NSP12_P323L	Spike_D614G	Spike_Y144del	M_I73M)
hCoV-19/Iran/GRC-teh10/2021	EPI_ISL_3053821	Spike_L18F	NS8_G8E	NSP3_S126L	Spike_S477N	NS8_K68E	N_R203K	NSP2_H194Y	NS8_G66del	NSP12_G137C	Spike_L5F	N_G204R	Spike_D138Y	NSP8_A14T	NS8_S67del	NSP12_P323L	Spike_D614G	M_I73M	Spike_A163T)
hCoV-19/Iran/GRC-teh15/2021	EPI_ISL_3053822	NSP2_A621V	N_M234I	N_S194L	Spike_H655Y	NSP2_T573A	NSP12_P323L	NSP2_N195T	Spike_D614G	N_A211T)
hCoV-19/Iran/GRC-teh6/2021	EPI_ISL_3053824	Spike_R78K	NSP3_S126L	Spike_S477N	NS8_K68E	N_R203K	Spike_G181A	NS8_G66del	NSP12_G137C	N_G204R	Spike_D138Y	NSP9_Q49K	NS8_S67del	NSP12_P323L	Spike_D614G	M_I73M	Spike_A163T)
hCoV-19/Iran/GRC-teh5/2021	EPI_ISL_3053825	Spike_H69del	NS8_Q27stop	NSP3_T183I	Spike_T716I	NSP6_S106del	N_R203K	Spike_A570D	Spike_N501Y	NSP3_I1412T	NS8_R52I	Spike_P681H	Spike_Y144del	NS3_G100C	NSP6_G107del	NSP3_A890D	Spike_D1118H	NSP6_F108del	NS8_Y73C	N_G204R	Spike_V70del	NSP12_P323L	Spike_D614G	N_D3L	Spike_S982A	N_S235F)
hCoV-19/Iran/GRC-S8954/2021	EPI_ISL_3053831	NSP3_E382K	NSP3_S126L	NSP3_K1737N	Spike_S477N	NS8_K68E	N_R203K	NS8_G66del	NSP12_G137C	N_G204R	Spike_D138Y	NS8_S67del	NSP12_P323L	Spike_D614G	M_I73M	N_D3L	N_S235F)
hCoV-19/Iran/GRC-S8962/2021	EPI_ISL_3053832	NSP3_S126L	Spike_S477N	NS8_K68E	N_R203K	NS8_G66del	NSP12_G137C	N_G204R	Spike_D138Y	NS8_S67del	NSP12_P323L	Spike_D614G	M_I73M	N_S235F)
hCoV-19/Iran/GRC-S9050/2021	EPI_ISL_3055258	Spike_H69del	NS8_Q27stop	NSP3_T183I	Spike_T716I	NSP6_S106del	N_R203K	Spike_A570D	Spike_F490S	Spike_I210del	Spike_N501Y	NS8_S67del	NSP3_I1412T	NS7a_S83L	Spike_P681H	Spike_Y144del	NSP6_G107del	NSP3_A890D	NS8_K68E	Spike_D1118H	NSP6_F108del	NS8_G66del	NS8_Y73C	N_G204R	Spike_V70del	Spike_I100T	Spike_Y365C	NSP12_P323L	Spike_D614G	N_D3L	Spike_S982A	N_S235F	NSP12_G137S)
hCoV-19/Iran/GRC-T-I-11-109/2021	EPI_ISL_3055330	Spike_H69del	NS8_Q27stop	NSP3_T183I	Spike_T716I	NSP6_S106del	N_R203K	Spike_A570D	Spike_D138Y	Spike_N501Y	NS8_S67del	NSP3_I1412T	NS7a_S83L	Spike_P681H	Spike_Y144del	Spike_W104C	Spike_S477N	NSP6_G107del	NSP3_A890D	NS8_K68E	Spike_D1118H	NSP6_F108del	NS8_G66del	NS8_Y73C	NSP12_G137C	N_G204R	Spike_V70del	NSP12_P323L	Spike_D614G	N_D3L	Spike_S982A	N_S235F)
hCoV-19/Iran/GRC-T11241/2021	EPI_ISL_3068588	NSP3_P679L	N_S194L	NS3_Q57H	Spike_I210del	NSP12_P323L	N_L221F	Spike_D614G)
hCoV-19/Iran/GRC-TA37/2021	EPI_ISL_3070765	NSP3_S126L	NSP3_T1189I	Spike_S477N	NS8_K68E	N_R203K	NS8_G66del	NSP12_G137C	N_G204R	Spike_D138Y	NS8_S67del	NSP12_P323L	Spike_D614G	NSP3_F961L	M_I73M	Spike_A771S)
hCoV-19/Iran/GRC-TA43/2021	EPI_ISL_3070766	NSP16_K253R	NSP2_E457K	N_S194L	NS3_T223I	NSP12_P323L	Spike_D614G	NSP6_V84F)
hCoV-19/Iran/GRC-TA35/2021	EPI_ISL_3070767	N_S194L	NSP7_A30V	NS3_Q57H	Spike_I210del	NSP12_P323L	Spike_D614G	NSP3_V1932F)
hCoV-19/Iran/GRC-TA18/2021	EPI_ISL_3070768	Spike_D936Y	N_S194L	Spike_P1162S	NS3_T223I	NSP3_D1225H	NSP12_P323L	Spike_D614G	NSP6_V84F	N_G25C)
hCoV-19/Iran/GRC-TA52/2021	EPI_ISL_3070769	NSP2_V198I	NSP8_T187I	NS7b_T40I	NS3_N234I	NS3_T151I	NSP4_T204I	NSP6_V26G	N_A35V	Spike_D614G	NSP6_L37F	NS3_A59S)
hCoV-19/Iran/GRC-teh17/2021	EPI_ISL_3070773	NSP3_T1269I	NSP3_T1004I	N_S194L	NS3_Q57H	Spike_T859N	Spike_I210del	NSP4_A457V	NSP12_P323L	NSP3_H1274Y	Spike_D614G	NSP6_L37F	NSP4_S209F)
hCoV-19/Iran/GRC-teh21/2021	EPI_ISL_3070774	NSP3_S126L	Spike_S477N	NS8_K68E	N_R203K	NS8_G66del	NSP12_G137C	N_G204R	Spike_D138Y	NSP9_Q49K	NS8_S67del	NSP12_P323L	Spike_D614G	NSP9_R74G	M_I73M)
hCoV-19/Iran/GRC-TA22/2021	EPI_ISL_3076920	Spike_Q675R	NSP2_A510V	N_S194L	N_P13T	NSP13_P504S	NS3_Q57H	Spike_I210del	NSP12_L638F	NSP12_P323L	Spike_D614G)
hCoV-19/Iran/GRC-S9047/2021	EPI_ISL_3076928	NSP3_S126L	Spike_S477N	NS8_K68E	N_R203K	NS8_G66del	NSP12_G137C	N_G204R	Spike_D138Y	NS8_S67del	NSP12_P323L	Spike_D614G	M_I73M	NSP3_A225V)
hCoV-19/Iran/GRC-S9049/2021	EPI_ISL_3076934	N_S194L	NSP3_H1307Y	Spike_F490S	NS3_Q57H	Spike_I210del	NSP3_P1921L	NSP12_P323L	Spike_D614G	NSP12_G137S)
hCoV-19/Iran/GRC-39982/2021	EPI_ISL_3076944	N_S194L	NS3_Q57H	Spike_I210del	NSP6_Y80C	NSP6_L260F	Spike_T678S	NSP9_T24I	NSP12_P323L	Spike_D614G	NSP3_A386V	Spike_Q675H	NSP3_S1560A)
hCoV-19/Iran/GRC-40017/2021	EPI_ISL_3077450	N_R203K	NSP3_S176N	N_D144Y	N_G204R	Spike_D138Y	NSP12_P323L	Spike_D614G	NSP15_G146V)
hCoV-19/Iran/GRC-40072/2021	EPI_ISL_3078071	NSP3_S126L	Spike_I1130M	Spike_S477N	NS8_K68E	NSP3_K1771R	NSP12_S795F	N_R203K	NS8_G66del	NSP12_G137C	NS3_T176I	N_G204R	Spike_D138Y	NSP9_Q49K	NS8_S67del	NSP12_P323L	Spike_D614G	M_I73M)
hCoV-19/Iran/GRC-40161/2021	EPI_ISL_3078875	NSP13_H290Y	N_S194L	NS3_F105L	NSP13_Y71H	NS3_Q57H	Spike_I210del	NSP6_Y80C	NSP12_P323L	Spike_D614G	N_A252S)
hCoV-19/Iran/GRC-B3/2021	EPI_ISL_3084571	N_G19R	NSP3_S126L	Spike_S477N	NS8_K68E	N_R203K	NS8_G66del	NSP12_G137C	N_G204R	Spike_D138Y	NSP9_Q49K	NS8_S67del	NSP12_P323L	Spike_D614G	M_A2S	M_I73M	N_Q389H	NSP9_R74K)
hCoV-19/Iran/GRC-B62/2021	EPI_ISL_3084572	Spike_D1260Y	N_S194L	NSP5_T21I	NSP10_L133F	NS3_Q57H	Spike_I210del	Spike_L5F	NS3_P240S	NS8_T11I	NSP6_Y80C	NSP12_K478N	NSP7_M75I	NSP12_P323L	NSP5_A191V	Spike_D614G	NS7a_R25K)
hCoV-19/Iran/GRC-B7-5-10/2021	EPI_ISL_3084574	M_L34F	NSP6_A46V	NS3_Q57H	Spike_P1069T	NSP14_A220V	NSP12_P323L	NSP2_R218C	NSP3_P389L	Spike_D614G	NSP8_A74V	Spike_D80Y	NSP7_D77N)
hCoV-19/Iran/GRC-B54/2021	EPI_ISL_3084577	NSP12_M629I	Spike_D1146E	NS3_P240L	N_S194L	NS3_T12I	N_D144Y	NSP6_T181I	NS3_Q57H	Spike_I210del	NSP4_A457V	NSP12_P323L	Spike_D614G)
hCoV-19/Iran/GRC-B56/2021	EPI_ISL_3085315	NSP3_S126L	Spike_S477N	NS8_K68E	N_R203K	NSP6_A79V	NS8_G66del	NSP2_T374I	NSP12_G137C	N_G204R	NSP14_A274S	NS7b_E39Q	Spike_D138Y	NSP9_Q49K	NS8_S67del	NSP12_P323L	Spike_D614G	M_I73M)
hCoV-19/Iran/GRC-B66-16-10/2021	EPI_ISL_3085358	NSP3_E382K	NSP3_S126L	Spike_S477N	NS8_K68E	N_R203K	NS8_G66del	NSP12_G137C	N_G204R	Spike_D138Y	NS8_S67del	NSP12_P323L	Spike_D614G	M_I73M)
hCoV-19/Iran/GRC-B74/2021	EPI_ISL_3085745	M_S197T	NSP4_T265A	N_S194L	NS3_Q57H	Spike_I210del	N_D103Y	NS3_P262S	NS3_G224C	NSP2_G265V	NSP3_P1228L	NSP12_P323L	NSP8_R51C	Spike_D614G)
hCoV-19/Iran/GRC-G0-Aa18/2021	EPI_ISL_3085825	NSP12_D62Y	N_S194L	Spike_V483A	NSP3_S1285F	NSP12_P323L	Spike_D614G	NSP3_D410G)
hCoV-19/Iran/GRC-teh26160/2021	EPI_ISL_3085877	N_S194L	NSP3_K1693N	NS8_I71V	NS3_T223I	NSP12_P323L	Spike_D614G	NSP6_V84F	Spike_A222V)
hCoV-19/Iran/GRC-teh26197/2021	EPI_ISL_3085878	N_S194L	NS3_Q57H	Spike_I210del	NSP6_Y80C	NSP1_L92F	Spike_S939F	NSP4_A146V	NSP12_P323L	Spike_D614G)
hCoV-19/Iran/HGRC-2-2162/2020	EPI_ISL_437512	NSP2_V198I	N_S186F	NSP16_G77R	Spike_T22I)
hCoV-19/Iran/KHGRC-2-2162/2020	EPI_ISL_442044	NSP2_V198I	N_S186F	NSP16_G77R	Spike_T22I)
hCoV-19/Iran/KHGRC-1.1-IPI-8206/2020	EPI_ISL_442523	NSP2_V198I	NSP14_T113I	NSP6_L37F)
hCoV-19/Iran/Maragheh-NIC-S2/2021	EPI_ISL_4803528	Spike_T95I	N_D63G	N_R203M	NSP12_G671S	Spike_I850L	NSP15_T325I	NS3_S26L	NS3_K16T	Spike_P681R	NSP3_P1228L	NSP3_A488S	NSP4_T492I	NSP14_A394V	Spike_T19R	NS7a_T120I	N_D377Y	M_I82T	Spike_D950N	NS7b_T40I	NSP13_P77L	NS7a_A50D	NS7a_D51H	NSP3_T6I	NSP3_P1469S	Spike_T478K	NSP6_T77A	NSP12_P323L	Spike_D614G	NS7a_L49P	NSP16_K160R)
hCoV-19/Iran/Ardakan-NIC-S5/2021	EPI_ISL_4803538	Spike_T95I	N_R203M	NSP12_G671S	Spike_G142D	Spike_D574Y	NS3_S26L	Spike_P681R	Spike_R158del	NSP3_P1228L	NS7a_V82A	NSP3_A488S	Spike_F157del	NSP4_T492I	NSP14_A394V	Spike_T19R	NS7a_T120I	N_D377Y	NSP3_S126L	M_I82T	Spike_D950N	NSP8_T124I	NS7b_T40I	NSP13_P77L	Spike_E156G	Spike_T299I	NSP3_P1469S	Spike_T478K	NSP6_T77A	NSP12_P323L	Spike_D614G	NSP4_V167L	Spike_L452R)
hCoV-19/Iran/North Khorasan-NIC-S6/2021	EPI_ISL_4803554	N_G215C	N_D63G	N_R203M	NSP12_G671S	Spike_T250I	Spike_G142D	NS3_S26L	Spike_P681R	Spike_R158del	NSP3_P1228L	NSP3_T1180I	NS7a_V82A	NSP3_A488S	Spike_F157del	NSP4_T492I	NSP14_A394V	Spike_T19R	NS7a_T120I	NSP3_S1717L	N_D377Y	M_I82T	Spike_D950N	NS7b_T40I	NSP13_P77L	Spike_E156G	Spike_T29A	NSP3_P1469S	NSP13_A598S	Spike_T478K	NSP14_V120I	NSP6_T77A	NSP12_P323L	Spike_D614G	NSP2_S543P	NSP4_V167L	Spike_L452R	NSP3_I1489M	NSP4_T295I)
hCoV-19/Iran/Tehran-NIC-S7/2021	EPI_ISL_4803556	Spike_H69del	NS8_Q27stop	NSP3_T183I	Spike_K1191N	Spike_T716I	NS8_K68stop	NSP6_S106del	N_R203K	Spike_A570D	Spike_N501Y	Spike_L699I	NSP3_I1412T	NS7a_S83L	NS8_R52I	Spike_P681H	Spike_Y144del	NSP15_S147G	NSP6_G107del	NSP3_A890D	Spike_D1118H	NSP6_F108del	NSP3_T725I	NS8_Y73C	N_G204R	Spike_V70del	Spike_I100T	NSP12_P323L	Spike_D614G	N_D3L	Spike_S982A	N_S235F)
hCoV-19/Iran/Ahvaz-NIC-S8/2021	EPI_ISL_4803557	N_G215C	Spike_T95I	N_D63G	N_R203M	NSP12_G671S	NS3_L41F	Spike_G142D	Spike_I850L	NS3_S26L	NS3_K16T	Spike_P681R	Spike_R158del	NSP3_P1228L	Spike_A262S	NSP16_L183F	NSP3_A488S	Spike_F157del	NSP4_T492I	NSP14_A394V	Spike_T19R	NS7a_T120I	M_I82T	Spike_D950N	NS7b_T40I	NSP13_P77L	Spike_E156G	NSP3_P1469S	Spike_T478K	NSP6_T77A	NSP12_P323L	Spike_D614G	NSP4_V167L	NSP16_K160R)
hCoV-19/Iran/Ahvaz-NIC-S9/2021	EPI_ISL_4803558	N_G215C	Spike_T95I	N_D63G	N_R203M	NSP12_G671S	NS3_L41F	Spike_G142D	Spike_I850L	NS3_S26L	NS3_K16T	Spike_P681R	Spike_R158del	NSP3_P1228L	Spike_A262S	NS7a_V82A	NSP3_A488S	Spike_F157del	NSP4_T492I	NSP14_A394V	Spike_T19R	NS7a_T120I	N_D377Y	M_I82T	Spike_D950N	NS7b_T40I	NSP13_P77L	NS7a_A50D	Spike_E156G	NS7a_D51H	NSP15_A6S	NSP3_P1469S	Spike_T478K	NSP6_T77A	NSP12_P323L	Spike_D614G	NS7a_L49P	NSP4_V167L	Spike_L452R	NSP16_K160R)
hCoV-19/Iran/IRVSH-2/2020	EPI_ISL_514753	NSP1_W161L	NSP2_C136S	NSP3_N1778S	N_S194L	Spike_N1192S	Spike_D808G	NSP6_H64N	NSP2_E309A	NSP3_R1341L	NSP3_K232T	NSP12_P323L	Spike_H146R	Spike_D614G	NSP3_E229A	NSP3_C296R)
hCoV-19/Iran/GRC-1600/2020	EPI_ISL_582033	NSP2_V198I	NSP14_R163C	NSP3_K837N	NSP2_G12S	NSP6_L37F)
hCoV-19/Iran/GRC-2297/2020	EPI_ISL_594185	NSP2_V198I	NSP6_L37F	NSP3_E906D	Spike_A344S)
hCoV-19/Iran/GRC-1325/2020	EPI_ISL_594186	NSP2_V198I	NSP3_S403P	NSP6_L37F)
hCoV-19/Iran/GRC-2024/2020	EPI_ISL_594187	NSP2_V198I	NSP4_L360F	N_N192K	NSP6_L37F	NSP13_F475V)
hCoV-19/Iran/GRC-7650/2020	EPI_ISL_594188	NSP2_V198I	N_P13T	N_S186F	NSP6_L37F	NSP16_G77R	Spike_M1229I	NSP2_A593V	Spike_T22I	N_T24I)
hCoV-19/Iran/GRC-10582/2020	EPI_ISL_596451	NSP2_V198I	NSP15_V38F	Spike_S929I	NSP6_L37F	NSP14_M501I)
hCoV-19/Iran/GRC-43/2020	EPI_ISL_596453	NSP2_V198I	NSP2_R27C	NSP5_K90R	NSP4_M33I	NSP6_L37F)
hCoV-19/Iran/GRC-70/2020	EPI_ISL_596454	NSP2_V198I	NSP2_R27C	NS7b_T40I	NSP4_M33I	NSP6_L37F)
hCoV-19/Iran/GRC-9695/2020	EPI_ISL_596455	NSP13_H290Y	NS8_V62L	NSP12_P323L	Spike_D614G)
hCoV-19/Iran/Q100/2020	EPI_ISL_637099	NSP2_V198I	NSP2_H237Y	NSP2_R27C	Spike_T572I	NSP12_T801I	NSP4_M33I	NSP6_L37F)
hCoV-19/Iran/NIV-P1-Q100/2020	EPI_ISL_637100	NSP2_V198I	NSP2_H237Y	NSP2_R27C	Spike_T572I	NSP12_T801I	NSP4_M33I	NSP6_L37F)
hCoV-19/Iran/NIV-P2-Q100/2020	EPI_ISL_637101	NSP2_V198I	NSP2_H237Y	NSP2_R27C	Spike_T572I	NSP12_T801I	NSP4_M33I	NSP6_L37F)
hCoV-19/Iran/NIV-P1-Q111/2020	EPI_ISL_637103	NSP2_V198I	NS7b_L11F	NSP1_M85del	NSP2_R27C	NSP13_T351I	NSP4_M33I	NSP6_L37F)
hCoV-19/Iran/NIV-P2-Q111/2020	EPI_ISL_637104	NSP2_V198I	NS7b_L11F	NSP1_M85del	NSP2_R27C	NSP13_T351I	NSP4_M33I	NSP6_L37F)
hCoV-19/Iran/Cento-37431805/2020	EPI_ISL_815256	NSP2_V198I	NSP3_T942I	NS3_V112F	NSP3_L689F	NSP7_E50G	Spike_D614G	NSP6_L37F	N_A220V	NS3_T223A)
hCoV-19/Iran/N193/2021	EPI_ISL_833578	Spike_H69del	NS8_Q27stop	NSP3_T183I	Spike_T716I	NSP6_S106del	N_R203K	Spike_A570D	NSP13_K460R	NSP4_F17L	Spike_N501Y	NSP3_I1412T	NS8_R52I	Spike_P681H	Spike_Y144del	NSP6_G107del	NSP3_A890D	Spike_D1118H	NSP6_F108del	NS8_Y73C	N_G204R	Spike_V70del	NSP2_T547I	NSP12_P323L	Spike_D614G	Spike_S982A	N_S235F)
hCoV-19/Iran/Tehran-06/2020	EPI_ISL_862075	NSP3_S126L	Spike_S477N	NS8_K68E	N_R203K	NSP4_T354A	NSP3_A1033V	NS8_G66del	NSP12_G137C	Spike_M177I	N_G204R	Spike_D138Y	NS8_S67del	NSP12_P323L	Spike_D614G	M_I73M)
hCoV-19/Iran/Tehran-02/2020	EPI_ISL_862076	N_T296I	N_T362I	N_R203K	N_G204R	NS3_T223I	NSP12_P323L	Spike_D614G	NS8_L4F)
hCoV-19/Iran/Tehran-09/2020	EPI_ISL_862077	NSP2_V198I	NSP5_D248Y	NSP6_L37F)
hCoV-19/Iran/Tehran-08/2020	EPI_ISL_862078	NSP2_V198I	NSP2_R27C	NSP4_M33I	NSP6_L37F)
hCoV-19/Iran/Tehran-04/2020	EPI_ISL_862079	Spike_Q314R	NSP2_A510V	NSP3_G773R	N_S194L	N_P13T	NS3_Q57H	Spike_I210del	NSP1_S135N	NSP12_L638F	NSP12_P323L	Spike_D614G)
hCoV-19/Iran/Tehran-03/2020	EPI_ISL_862080	NSP13_H164Y	Spike_D950N	N_S194L	NSP6_A79V	NSP15_T112I	NS3_W131C	NS3_Q57H	Spike_I210del	NSP12_P323L	Spike_D574N	Spike_D614G	N_P383L	Spike_Q677H)
hCoV-19/Iran/Tehran-01/2020	EPI_ISL_862081	NSP3_S126L	Spike_S477N	NS8_K68E	N_R203K	NS8_G66del	NSP12_G137C	N_G204R	Spike_D138Y	NSP9_Q49K	NS8_S67del	NSP12_P323L	Spike_D614G	M_I73M)
hCoV-19/Iran/Gorgan-NIC992/2020	EPI_ISL_959275	NSP2_V198I	NSP13_P78S	NS3_T151I	N_N192K	NSP6_L37F	NSP13_F475V)
hCoV-19/Iran/Gorgan-NIC118/2020	EPI_ISL_959276	NSP2_V198I	NSP2_R27C	NSP4_M33I	NSP6_L37F)
hCoV-19/Iran/Gilan-NIC230/2020	EPI_ISL_959277	NSP2_S305I	N_S194L	NS3_Q57H	Spike_I210del	NSP12_P323L	NSP7_E50G	Spike_D614G)
hCoV-19/Iran/Gilan-NIC184/2020	EPI_ISL_959278	NSP13_S485L	N_M234I	NS3_Q57H	N_D3Y	NSP12_P323L	Spike_D614G)
hCoV-19/Iran/Tehran-NIC45RC/2020	EPI_ISL_959279	NS3_Q57H	Spike_I210del	NSP7_N78S	N_S201I	NSP3_T64I	NSP12_P323L	Spike_D614G)
hCoV-19/Iran/Gorgan-NIC028/2020	EPI_ISL_959280	NSP2_V198I	NSP1_M85del	NSP2_R27C	NSP1_V86del	NSP4_M33I	Spike_G142S	NSP6_L37F)
hCoV-19/Iran/Gilan-NICS1-58/2020	EPI_ISL_959281	NSP13_L176F	N_R203K	NS3_G254V	N_G204R	NSP12_P323L	Spike_D614G)
hCoV-19/Iran/Gilan-NIC189/2020	EPI_ISL_959282	NSP13_S485L	N_M234I	NS3_Q57H	N_D3Y	NSP12_P323L	Spike_D614G)
hCoV-19/Iran/Gorgan-NIC140/2020	EPI_ISL_959283	NSP2_V198I	NSP2_R27C	NS7a_A105V	NSP4_M33I	NSP6_L37F)
hCoV-19/Iran/Tehran-NIC12RC/2020	EPI_ISL_959284	N_R203K	NS3_S58G	NSP13_A598V	N_G204R	Spike_A846V	Spike_D138Y	Spike_A845S	NSP3_Q995H	NSP12_P323L	Spike_D614G	NSP3_P874S)
